# Supplementary material for: Generation and Integrated Analysis of Advanced Patient‐Derived Orthoxenograft Models (PDOX) for the Rational Assessment of Targeted Therapies in Endometrial Cancer
Source: PubMed Central journal article supplement (PMC9811454; doi:10.1002/advs.202204211), 2022-11-14
Supplement: ADVS-10-2204211-s001.pdf [file ADVS-10-2204211-s001.pdf]

## SUPPORTING TABLES

**Table S1: Patients characteristics**

---

|                          |                    |
|--------------------------|--------------------|
| <b>Age</b>               | (N=15)             |
| Mean ( $\pm$ sd)         | 61.1 ( $\pm$ 13.9) |
| Median                   | 59                 |
| <b>BMI</b>               | (N=15)             |
| Mean ( $\pm$ sd)         | 30.3 ( $\pm$ 5.1)  |
| Median                   | 31.5               |
| <b>Tumor type</b>        | (N=15)             |
| Endometrioid             | 14 (93.3%)         |
| Mixed (90% endometrioid) | 1 (6.7%)           |
| <b>Grade</b>             | (N=15)             |
| 1                        | 6 (40%)            |
| 2                        | 4 (26.7%)          |
| 3                        | 5 (33.3%)          |
| <b>FIGO</b>              | (N=15)             |
| IA                       | 10 (66.7%)         |
| IB                       | 2 (13.3%)          |
| II                       | 2 (13.3%)          |
| IIIC2                    | 1 (6.7%)           |
| <b>Treatment</b>         | (N=15)             |
| None                     | 7 (46.7%)          |
| BT                       | 4 (26.7%)          |
| BT+RT                    | 3 (20.0%)          |
| CT+RT                    | 1 (6.7%)           |
| <b>Recurrence</b>        | (N=15)             |
| No                       | 13 (86.7%)         |
| Yes                      | 2 (13.3%)          |
| <b>Death</b>             | (N=15)             |
| No                       | 14 (93,3%)         |
| Yes                      | 1 (6,7%)           |
| <b>Follow-up</b>         | (N=15)             |

Mean months (CI) 59.27 (47.30-71.23)

**PDOX growth time** (N=15)

Mean days (CI) 102.47 (84.57-120.36)

---

**Table S2: Individual patient clinical parameters**

---

| <b>Patient</b> | <b>Age</b> | <b>BMI</b> | <b>Treatment</b> | <b>Time-elapsed after primary tumor PDOX engraftment to first passage in mice</b> |
|----------------|------------|------------|------------------|-----------------------------------------------------------------------------------|
| 1              | 49         | 24         | BT               | 128                                                                               |
| 2              | 50         | 34         | BT               | 115                                                                               |
| 3              | 73         | 36         | None             | 49                                                                                |
| 4              | 35         | 21         | CT+RT            | 113                                                                               |
| 5              | 85         | 32.1       | BT+RT            | 30                                                                                |
| 6              | 77         | 31         | None             | 99                                                                                |
| 7              | 59         | 23.3       | BT+RT            | 109                                                                               |
| 8              | 67         | 27.8       | None             | 79                                                                                |
| 9              | 54         | 39         | None             | 98                                                                                |
| 10             | 84         | 31.5       | None             | 120                                                                               |
| 11             | 51         | 25         | BT               | 90                                                                                |
| 12             | 61         | 33.8       | BT+RT            | 152                                                                               |
| 13             | 58         | 30.9       | None             | 96                                                                                |
| 14             | 59         | 34         | None             | 113                                                                               |
| 15             | 54         | 31.7       | BT               | 146                                                                               |

---

**Table S3. Histologic characterization of primary tumors and PDOX**

| Case | TCGA | Histology |        | Grade |      | PTEN |      | TP53 |      | CTNNB1 (nuclear) |      | ESR |      | MSH6 |      | PMS2 |      |
|------|------|-----------|--------|-------|------|------|------|------|------|------------------|------|-----|------|------|------|------|------|
|      |      | BX        | PDOX   | BX    | PDOX | BX   | PDOX | BX   | PDOX | BX               | PDOX | BX  | PDOX | BX   | PDOX | BX   | PDOX |
| 1    | TP53 | EEC       | EEC    | G2    | G2   | Loss | Loss | Abn  | Abn  | -                | -    | +   | +    | WT   | WT   | WT   | WT   |
| 2    | POLE | EEC       | EEC    | G3    | G3   | Loss | Loss | WT   | WT   | -                | -    | -   | -    | Loss | Loss | WT   | WT   |
| 3    | MSI  | EEC       | EEC    | G1    | G2   | WT   | WT   | WT   | WT   | -                | -    | +   | +    | WT   | WT   | Loss | Loss |
| 4    | MSS  | EEC       | EEC    | G3    | G2   | WT   | WT   | WT   | WT   | -                | -    | +   | +    | WT   | WT   | WT   | WT   |
| 5    | MSI  | EEC       | EEC    | G3    | G3   | WT   | WT   | WT   | WT   | +                | +    | -   | -    | WT   | WT   | Loss | Loss |
| 6    | MSI  | EEC       | EEC    | G2    | G2   | WT   | WT   | WT   | WT   | -                | -    | +   | +    | WT   | WT   | Loss | Loss |
| 7    | MSS  | EEC       | Undiff | G1    | G3   | WT   | WT   | WT   | WT   | -                | -    | +   | -    | WT   | WT   | WT   | WT   |
| 8    | MSI  | EEC       | EEC    | G1    | G1   | Loss | Loss | WT   | WT   | -                | -    | +   | +    | WT   | WT   | Loss | Loss |
| 9    | MSS  | EEC       | EEC    | G1    | G1   | Loss | Loss | WT   | WT   | +                | +    | +   | +    | WT   | WT   | WT   | WT   |
| 10   | MSI  | EEC       | EEC    | G1    | G1   | WT   | WT   | WT   | WT   | -                | -    | +   | +    | WT   | WT   | Loss | Loss |
| 11   | MSI  | Mixed     | Mixed  | G3    | G3   | Loss | Loss | WT   | WT   | -                | -    | +   | +    | WT   | WT   | Loss | Loss |
| 12   | MSI  | EEC       | EEC    | G1    | G1   | Loss | Loss | WT   | WT   | -                | -    | +   | +    | WT   | WT   | Loss | Loss |
| 13   | MSS  | EEC       | Serous | G2    | G2   | Loss | Loss | WT   | Abn  | -                | -    | +   | +    | WT   | WT   | WT   | WT   |
| 14   | MSI  | EEC       | EEC    | G2    | G3   | Loss | Loss | WT   | WT   | -                | -    | +   | +    | WT   | WT   | Loss | Loss |
| 15   | MSS  | EEC       | EEC    | G3    | G3   | Loss | Loss | WT   | WT   | -                | -    | +   | +    | WT   | WT   | WT   | WT   |

**Table S4. Differentially expressed genes PDOX vs BX**

| Gene    | logFC        | AveExpr      | t            | P.Value     | adj.P.Val   | B statistic |
|---------|--------------|--------------|--------------|-------------|-------------|-------------|
| C1QB    | -7,814922925 | 1,868216456  | -22,39080318 | 4,15916E-21 | 5,08307E-17 | 37,6826424  |
| C1QA    | -7,66019027  | 1,799580054  | -21,66837235 | 1,11456E-20 | 5,08307E-17 | 36,76541243 |
| TYROBP  | -6,963280723 | 1,567376174  | -21,64417598 | 1,15255E-20 | 5,08307E-17 | 36,73413673 |
| C1QC    | -7,412964263 | 1,598733799  | -21,55820184 | 1,29864E-20 | 5,08307E-17 | 36,6227118  |
| CLEC14A | -5,587954538 | 0,717256717  | -21,46638945 | 1,47583E-20 | 5,08307E-17 | 36,50320678 |
| SPI1    | -5,444553187 | 0,707378125  | -20,18458471 | 9,26759E-20 | 2,65995E-16 | 34,77743355 |
| SLAMF8  | -5,496187136 | 0,695962838  | -19,3851532  | 3,06896E-19 | 6,68589E-16 | 33,64402193 |
| FCER1G  | -6,12959568  | 2,017399602  | -19,37729833 | 3,10592E-19 | 6,68589E-16 | 33,63265678 |
| ABI3    | -4,66939749  | 0,295453738  | -19,2351486  | 3,86008E-19 | 7,38604E-16 | 33,42619432 |
| DCN     | -7,912376879 | 2,860590238  | -18,89782777 | 6,5013E-19  | 1,11959E-15 | 32,93021726 |
| AIF1    | -6,179118086 | 1,036547619  | -18,6721115  | 9,25558E-19 | 1,449E-15   | 32,59350598 |
| FCGR3A  | -7,165966752 | 1,628361201  | -18,41852404 | 1,38233E-18 | 1,98376E-15 | 32,21050324 |
| MPEG1   | -5,911680551 | 0,956197276  | -18,29383127 | 1,68658E-18 | 2,23421E-15 | 32,02031775 |
| APBB1IP | -4,580569852 | 0,182536593  | -17,87256461 | 3,33081E-18 | 4,09713E-15 | 31,36854937 |
| CD93    | -6,414983117 | 1,236691756  | -17,78718385 | 3,82956E-18 | 4,39659E-15 | 31,23468613 |
| FCGR2A  | -6,608132982 | 1,386464083  | -17,74591951 | 4,09753E-18 | 4,41022E-15 | 31,1697741  |
| CD2     | -5,694804974 | 0,852421511  | -17,58987979 | 5,29792E-18 | 5,36679E-15 | 30,92302868 |
| SPARC   | -9,141039395 | 4,207004753  | -17,2772907  | 8,91442E-18 | 8,52863E-15 | 30,42254957 |
| CYTH4   | -5,048042807 | 0,600751332  | -16,95232521 | 1,54376E-17 | 1,34053E-14 | 29,89333418 |
| ELTD1   | -5,61363943  | 0,814504256  | -16,93232567 | 1,59726E-17 | 1,34053E-14 | 29,86046236 |
| CSF1R   | -6,023060225 | 1,249842964  | -16,91873724 | 1,6347E-17  | 1,34053E-14 | 29,83810786 |
| RGS1    | -7,335967252 | 1,739307808  | -16,68924523 | 2,42306E-17 | 1,89671E-14 | 29,45808693 |
| SLA     | -5,643033916 | 0,837008861  | -16,5529819  | 3,06723E-17 | 2,29655E-14 | 29,23020781 |
| CYYR1   | -5,036357229 | 0,410430282  | -16,28069082 | 4,93585E-17 | 3,54167E-14 | 28,76976765 |
| FLI1    | -4,980161875 | 0,56454293   | -16,17588776 | 5,93768E-17 | 4,09011E-14 | 28,59072044 |
| MS4A6A  | -6,40371989  | 1,1169257    | -16,00573571 | 8,03143E-17 | 5,27464E-14 | 28,29783731 |
| GIMAP6  | -4,7393148   | 0,407609434  | -15,98933095 | 8,26985E-17 | 5,27464E-14 | 28,26945527 |
| PLVAP   | -6,255626616 | 1,920225786  | -15,93044753 | 9,18724E-17 | 5,65048E-14 | 28,16736985 |
| TMEM204 | -4,644736136 | 0,426445028  | -15,90771249 | 9,56887E-17 | 5,68226E-14 | 28,12786603 |
| LCP2    | -5,736803542 | 0,89674134   | -15,86055586 | 1,04132E-16 | 5,97755E-14 | 28,04577042 |
| MRVI1   | -5,322397915 | 0,963304103  | -15,64627091 | 1,53303E-16 | 8,51623E-14 | 27,67002284 |
| CD3E    | -4,892186917 | 0,737502524  | -15,57963739 | 1,7304E-16  | 9,31223E-14 | 27,55227301 |
| STAB1   | -5,938827953 | 2,278400619  | -15,46269602 | 2,14225E-16 | 1,09724E-13 | 27,34457073 |
| ROBO4   | -4,876452814 | 0,330478074  | -15,45659621 | 2,16632E-16 | 1,09724E-13 | 27,33369976 |
| COL15A1 | -6,422871146 | 1,763815365  | -15,32638371 | 2,75196E-16 | 1,35404E-13 | 27,10075767 |
| CCR5    | -4,57634218  | 0,180422757  | -15,25280934 | 3,15254E-16 | 1,50805E-13 | 26,96839071 |
| SASH3   | -4,992300421 | 0,687620781  | -15,05875286 | 4,52247E-16 | 2,1049E-13  | 26,61665211 |
| GYPC    | -4,94670184  | 0,466278541  | -15,02978219 | 4,77424E-16 | 2,16361E-13 | 26,56381356 |
| NDN     | -4,942256415 | 0,476253756  | -15,01282701 | 4,92822E-16 | 2,17612E-13 | 26,53284991 |
| PDGFRB  | -6,886855887 | 2,283122905  | -14,99118579 | 5,13219E-16 | 2,20954E-13 | 26,49328592 |
| GNLY    | -5,179000123 | 0,504565816  | -14,94023645 | 5,64736E-16 | 2,37203E-13 | 26,39995213 |
| EVI2B   | -5,300023245 | 0,661686826  | -14,84456442 | 6,76307E-16 | 2,71133E-13 | 26,22396994 |
| CD37    | -4,487694842 | 0,157454344  | -14,84401745 | 6,77006E-16 | 2,71133E-13 | 26,22296111 |
| CXorf36 | -4,683596467 | 0,234049901  | -14,71652305 | 8,62048E-16 | 3,37394E-13 | 25,98696381 |
| RAMP3   | -5,455866508 | 0,814887089  | -14,53805405 | 1,21222E-15 | 4,63901E-13 | 25,65375569 |
| TREM2   | -4,598552086 | 0,297242479  | -14,51496872 | 1,26715E-15 | 4,74384E-13 | 25,61040931 |
| CD247   | -4,016658163 | 0,035744818  | -14,41627501 | 1,53243E-15 | 5,6149E-13  | 25,42445796 |
| LST1    | -5,417246617 | 0,709925566  | -14,32473763 | 1,82946E-15 | 6,56358E-13 | 25,25106065 |
| DOK2    | -3,744463153 | -0,153983556 | -14,2975389  | 1,92866E-15 | 6,77826E-13 | 25,19936539 |
| LILRB4  | -5,137129491 | 0,486844614  | -14,21056925 | 2,28455E-15 | 7,86843E-13 | 25,03353112 |

|          |              |              |              |             |             |             |
|----------|--------------|--------------|--------------|-------------|-------------|-------------|
| ITGAX    | -5,48024372  | 1,322660245  | -14,19380007 | 2,36058E-15 | 7,97088E-13 | 25,00146144 |
| PTPRC    | -6,45268209  | 1,382046501  | -14,17927669 | 2,42853E-15 | 8,04262E-13 | 24,97366199 |
| RASAL3   | -4,017620404 | 0,47345537   | -14,16489507 | 2,49779E-15 | 8,11593E-13 | 24,94611133 |
| HCK      | -5,005590274 | 0,709010789  | -14,09246755 | 2,87873E-15 | 9,18049E-13 | 24,80702065 |
| CD84     | -4,852444959 | 0,318474147  | -14,01083357 | 3,38035E-15 | 1,05842E-12 | 24,64956224 |
| LAIR1    | -5,001141552 | 0,904185524  | -13,97995127 | 3,59277E-15 | 1,10484E-12 | 24,58980462 |
| IL16     | -4,470612103 | 0,780129083  | -13,8913048  | 4,28194E-15 | 1,29367E-12 | 24,41768799 |
| TRAF3IP3 | -3,982412551 | -0,047550683 | -13,7870555  | 5,26889E-15 | 1,56441E-12 | 24,21416135 |
| VSIG4    | -5,311579787 | 0,579069341  | -13,74277986 | 5,75605E-15 | 1,68008E-12 | 24,12735488 |
| TIGIT    | -4,629314868 | 0,282714287  | -13,70724077 | 6,18041E-15 | 1,77388E-12 | 24,05751831 |
| DOCK2    | -4,593025189 | 0,26203482   | -13,67465597 | 6,59769E-15 | 1,8626E-12  | 23,99336242 |
| FCGR1A   | -4,914697064 | 0,349600199  | -13,64229648 | 7,04074E-15 | 1,92877E-12 | 23,9295318  |
| HOXD10   | -4,608815104 | 0,385950336  | -13,64121436 | 7,05608E-15 | 1,92877E-12 | 23,92739522 |
| GIMAP1   | -3,4874944   | -0,309551203 | -13,58779552 | 7,85719E-15 | 2,08384E-12 | 23,82175879 |
| IGLL5    | -8,478650234 | 2,321861191  | -13,58727977 | 7,86537E-15 | 2,08384E-12 | 23,82073731 |
| SPN      | -3,729564621 | -0,181237508 | -13,57772615 | 8,01837E-15 | 2,09219E-12 | 23,80181031 |
| LILRB2   | -4,62087369  | 0,202688512  | -13,54385484 | 8,58585E-15 | 2,20682E-12 | 23,73462323 |
| ADORA3   | -3,604059193 | -0,14828729  | -13,47470295 | 9,87595E-15 | 2,50108E-12 | 23,59704851 |
| ARHGAP9  | -4,482836457 | 0,6913504    | -13,45693274 | 1,02385E-14 | 2,55533E-12 | 23,56160735 |
| VWF      | -5,849211507 | 2,882184865  | -13,44949308 | 1,03944E-14 | 2,55716E-12 | 23,54675887 |
| COL3A1   | -8,647755135 | 4,456930782  | -13,34925235 | 1,27479E-14 | 3,09199E-12 | 23,34607417 |
| CD52     | -5,943181402 | 1,217293922  | -13,29549026 | 1,42289E-14 | 3,40328E-12 | 23,23796465 |
| ARHGAP25 | -4,648960956 | 0,926310079  | -13,28269517 | 1,46067E-14 | 3,44578E-12 | 23,21218597 |
| IKZF1    | -4,410421333 | 0,522711158  | -13,24487195 | 1,57848E-14 | 3,67338E-12 | 23,13587151 |
| GIMAP7   | -4,368013341 | 0,315045484  | -13,19292101 | 1,75638E-14 | 4,03288E-12 | 23,03078147 |
| NKG7     | -4,972885178 | 0,447197582  | -13,18270735 | 1,79371E-14 | 4,0644E-12  | 23,01008363 |
| CNRIP1   | -4,129165903 | 0,003003879  | -13,17250146 | 1,83182E-14 | 4,09686E-12 | 22,9893894  |
| HAVCR2   | -5,003847329 | 0,878810438  | -13,15379566 | 1,90385E-14 | 4,20336E-12 | 22,95142856 |
| ANGPT2   | -5,900526221 | 1,75635974   | -13,14415673 | 1,94209E-14 | 4,23352E-12 | 22,93185177 |
| FCGR2B   | -5,169034647 | 0,47676899   | -13,1040207  | 2,11E-14    | 4,54204E-12 | 22,85021813 |
| PLEK     | -5,76174741  | 1,129824181  | -13,07080415 | 2,26019E-14 | 4,80527E-12 | 22,78251551 |
| FLT1     | -5,963811996 | 2,152036929  | -13,05482921 | 2,33628E-14 | 4,90648E-12 | 22,74990898 |
| GPR116   | -5,000684407 | 1,111506685  | -13,0156517  | 2,53422E-14 | 5,24557E-12 | 22,66981658 |
| FPR3     | -4,930021882 | 0,411104476  | -13,01103197 | 2,55867E-14 | 5,24557E-12 | 22,66036033 |
| ZEB2     | -5,132420072 | 0,887809771  | -13,00002066 | 2,61792E-14 | 5,30391E-12 | 22,63781087 |
| C3AR1    | -5,126822576 | 0,455662955  | -12,94764529 | 2,91963E-14 | 5,8464E-12  | 22,53035823 |
| FNDC1    | -4,565656225 | 0,403478957  | -12,90996727 | 3,15856E-14 | 6,25213E-12 | 22,45285777 |
| GGT5     | -4,33454745  | 0,750049659  | -12,88937324 | 3,29754E-14 | 6,45305E-12 | 22,41042647 |
| GPR4     | -3,877871766 | -0,145903675 | -12,88074184 | 3,35763E-14 | 6,49683E-12 | 22,39262762 |
| CD53     | -6,037901657 | 1,842461847  | -12,87123964 | 3,4251E-14  | 6,55373E-12 | 22,37302284 |
| IL10RA   | -4,689022902 | 1,17096223   | -12,81250983 | 3,87407E-14 | 7,33136E-12 | 22,25161398 |
| A2M      | -7,722541104 | 3,972616434  | -12,78768245 | 4,08162E-14 | 7,64017E-12 | 22,20016596 |
| FGR      | -4,851095032 | 0,630816439  | -12,74251693 | 4,48892E-14 | 8,31222E-12 | 22,10638356 |
| GZMA     | -5,3202227   | 0,826330751  | -12,73307596 | 4,57919E-14 | 8,38918E-12 | 22,0867493  |
| CXCL9    | -6,681974115 | 1,490395915  | -12,71000549 | 4,80771E-14 | 8,71512E-12 | 22,03872491 |
| FERMT3   | -3,523580879 | 1,865521815  | -12,64090522 | 5,56471E-14 | 9,98228E-12 | 21,89449999 |
| IGSF6    | -4,268014344 | 0,08070877   | -12,51053769 | 7,34336E-14 | 1,30371E-11 | 21,62082755 |
| NLRC3    | -3,558224006 | 0,060574432  | -12,49465931 | 7,59667E-14 | 1,33492E-11 | 21,58735409 |
| APOC2    | -4,86287055  | 0,528990322  | -12,47998883 | 7,83868E-14 | 1,35553E-11 | 21,55639973 |
| TESPA1   | -2,76543485  | -0,725030908 | -12,47804211 | 7,87138E-14 | 1,35553E-11 | 21,55229022 |
| CCL3     | -5,202834279 | 0,562172132  | -12,42435416 | 8,83056E-14 | 1,49774E-11 | 21,43877321 |
| SFRP4    | -6,431590506 | 1,545725076  | -12,42221737 | 8,87113E-14 | 1,49774E-11 | 21,43424792 |
| MYCT1    | -3,830580752 | -0,151060907 | -12,35439334 | 1,02631E-13 | 1,71593E-11 | 21,2903197  |

|           |              |              |              |             |             |             |
|-----------|--------------|--------------|--------------|-------------|-------------|-------------|
| CD27      | -4,239336671 | 0,158549035  | -12,3267838  | 1,08921E-13 | 1,80359E-11 | 21,23156822 |
| TNFAIP8L2 | -3,921301897 | -0,147097384 | -12,32088049 | 1,10317E-13 | 1,8093E-11  | 21,21899413 |
| GMFG      | -5,108151576 | 0,715626965  | -12,28350711 | 1,19587E-13 | 1,94284E-11 | 21,13928911 |
| AMICA1    | -4,231808232 | 0,374251873  | -12,25454325 | 1,27318E-13 | 2,04911E-11 | 21,07740027 |
| NCKAP1L   | -4,692905181 | 0,938864486  | -12,22666414 | 1,35244E-13 | 2,15652E-11 | 21,01773132 |
| FYB       | -4,893387514 | 0,98972134   | -12,15118114 | 1,59341E-13 | 2,51745E-11 | 20,85569354 |
| ISLR      | -6,035650956 | 2,545338612  | -12,12443246 | 1,68901E-13 | 2,64423E-11 | 20,79810283 |
| SAMD3     | -3,086838379 | -0,541515056 | -12,07550287 | 1,87938E-13 | 2,91575E-11 | 20,69252525 |
| COL6A3    | -7,328289567 | 3,430832427  | -12,05662211 | 1,9586E-13  | 3,01152E-11 | 20,65170546 |
| LILRB3    | -4,176036321 | -0,019730172 | -12,04292842 | 2,01819E-13 | 3,07568E-11 | 20,62207212 |
| IL2RB     | -4,528343545 | 1,013340625  | -12,01969715 | 2,12356E-13 | 3,20788E-11 | 20,57174564 |
| CXCR6     | -4,307170052 | 0,076864474  | -11,97446262 | 2,34522E-13 | 3,51192E-11 | 20,47355879 |
| INMT      | -3,258579073 | -0,376877899 | -11,96076323 | 2,41692E-13 | 3,56434E-11 | 20,443772   |
| RGS5      | -4,633747438 | 3,826987826  | -11,95988004 | 2,42162E-13 | 3,56434E-11 | 20,44185085 |
| LAPTM5    | -6,42203236  | 3,724157134  | -11,94918083 | 2,4793E-13  | 3,61831E-11 | 20,41856977 |
| CD163     | -5,940132615 | 0,973406238  | -11,92826918 | 2,59612E-13 | 3,75696E-11 | 20,37302525 |
| MMRN1     | -4,255274808 | 0,134115259  | -11,91768235 | 2,6574E-13  | 3,8136E-11  | 20,34994667 |
| CARD11    | -3,211026544 | -0,296472951 | -11,8801585  | 2,8868E-13  | 4,10856E-11 | 20,26803338 |
| ITK       | -4,120850039 | -0,047323313 | -11,87627665 | 2,91166E-13 | 4,10998E-11 | 20,25954927 |
| NTM       | -3,584182066 | -0,114164657 | -11,84646098 | 3,11008E-13 | 4,35436E-11 | 20,19432129 |
| KLRK1     | -4,231981835 | 0,079993649  | -11,83342156 | 3,20116E-13 | 4,44574E-11 | 20,16575949 |
| SIGLEC10  | -4,421829043 | 0,103166188  | -11,80807771 | 3,38608E-13 | 4,66493E-11 | 20,11018425 |
| MYO1G     | -3,41572415  | 0,117873146  | -11,75818575 | 3,78277E-13 | 5,17008E-11 | 20,00054066 |
| MS4A4A    | -4,610229929 | 0,228394413  | -11,75128161 | 3,8413E-13  | 5,19719E-11 | 19,98534308 |
| IFFO1     | -3,673719489 | 0,581508829  | -11,74875314 | 3,86296E-13 | 5,19719E-11 | 19,97977583 |
| GIMAP8    | -4,039437563 | 0,372274734  | -11,71031967 | 4,20815E-13 | 5,61771E-11 | 19,89505179 |
| ITGAL     | -4,63857996  | 1,188514212  | -11,66630565 | 4,64252E-13 | 6,14073E-11 | 19,79779456 |
| LILRB1    | -3,737314085 | 0,063082122  | -11,66354509 | 4,67125E-13 | 6,14073E-11 | 19,79168632 |
| SLAMF7    | -5,281770396 | 0,891770568  | -11,63936778 | 4,93077E-13 | 6,43222E-11 | 19,73814823 |
| CSF2RB    | -4,627978573 | 0,238015192  | -11,63603547 | 4,96768E-13 | 6,43222E-11 | 19,73076333 |
| NID2      | -4,833074577 | 0,722322599  | -11,62766172 | 5,06169E-13 | 6,50503E-11 | 19,71219954 |
| MS4A7     | -4,883247561 | 0,392499873  | -11,60171928 | 5,36466E-13 | 6,84332E-11 | 19,6546307  |
| C1orf162  | -3,664858686 | 1,20135071   | -11,56886491 | 5,7752E-13  | 7,31284E-11 | 19,58159982 |
| EMCN      | -4,314929829 | 0,08149082   | -11,52396229 | 6,38892E-13 | 8,03092E-11 | 19,48156316 |
| CD86      | -4,732927618 | 0,64365662   | -11,51663087 | 6,49529E-13 | 8,10547E-11 | 19,46520518 |
| HK3       | -3,815060598 | -0,009340655 | -11,47203467 | 7,18263E-13 | 8,89871E-11 | 19,3655523  |
| SLAMF6    | -3,750392007 | -0,191311585 | -11,43082458 | 7,88398E-13 | 9,69786E-11 | 19,27323785 |
| EVI2A     | -5,339623214 | 0,670168608  | -11,36794252 | 9,09203E-13 | 1,11026E-10 | 19,13195305 |
| GIMAP4    | -5,5616421   | 1,098532171  | -11,36490654 | 9,15494E-13 | 1,11026E-10 | 19,1251188  |
| OLFML2B   | -4,70898361  | 1,571446235  | -11,35360313 | 9,39311E-13 | 1,13118E-10 | 19,09966329 |
| SH2D3C    | -3,948405243 | 0,528721523  | -11,2426213  | 1,20973E-12 | 1,44672E-10 | 18,8488485  |
| SIGLEC9   | -2,853873394 | -0,639570892 | -11,16023896 | 1,4611E-12  | 1,73528E-10 | 18,66162962 |
| SRGN      | -6,714019653 | 2,420742268  | -11,12062908 | 1,60042E-12 | 1,88773E-10 | 18,57129786 |
| THBS2     | -5,913176652 | 1,469463165  | -11,11297322 | 1,62888E-12 | 1,90822E-10 | 18,55381469 |
| PRKCB     | -3,859693536 | -0,045931403 | -11,09721498 | 1,6891E-12  | 1,9654E-10  | 18,51780449 |
| SPARCL1   | -6,854973046 | 2,903330912  | -11,09399278 | 1,70169E-12 | 1,96676E-10 | 18,51043721 |
| GPR65     | -3,99912998  | 0,05086723   | -11,04853621 | 1,88991E-12 | 2,16975E-10 | 18,40635956 |
| IGJ       | -7,400688599 | 1,963616011  | -11,02298653 | 2,00494E-12 | 2,28656E-10 | 18,34774166 |
| BIN2      | -4,18294869  | 0,603575063  | -10,98118737 | 2,20879E-12 | 2,50089E-10 | 18,2516578  |
| CLEC2B    | -5,303944767 | 1,173836468  | -10,9786337  | 2,22191E-12 | 2,50089E-10 | 18,24578023 |
| RUNX1T1   | -3,514578639 | -0,125848855 | -10,92435519 | 2,5205E-12  | 2,81854E-10 | 18,12064805 |
| CXCL12    | -5,282811833 | 0,596253583  | -10,91512452 | 2,57523E-12 | 2,86116E-10 | 18,09932924 |
| IL21R     | -3,520453397 | -0,32461286  | -10,89077892 | 2,72547E-12 | 3,0075E-10  | 18,04304752 |

|           |              |              |              |             |             |             |
|-----------|--------------|--------------|--------------|-------------|-------------|-------------|
| GZMB      | -5,139975282 | 0,736550237  | -10,88820502 | 2,74187E-12 | 3,0075E-10  | 18,03709264 |
| TNFRSF4   | -2,788274219 | -0,580214092 | -10,88455056 | 2,76533E-12 | 3,01403E-10 | 18,02863631 |
| MARCH1    | -4,016623686 | 0,21074099   | -10,75771396 | 3,72062E-12 | 4,02974E-10 | 17,73404359 |
| CD3D      | -4,48458665  | 0,461855493  | -10,74339707 | 3,84785E-12 | 4,12937E-10 | 17,70065689 |
| MSR1      | -5,10281673  | 0,782813895  | -10,74199152 | 3,86057E-12 | 4,12937E-10 | 17,69737769 |
| C11orf96  | -4,595153726 | 0,813965825  | -10,7193392  | 4,07174E-12 | 4,31519E-10 | 17,64449301 |
| CD48      | -5,468936901 | 0,695223443  | -10,71748625 | 4,08953E-12 | 4,31519E-10 | 17,64016405 |
| LY86      | -3,664807217 | -0,275344725 | -10,71541941 | 4,10946E-12 | 4,31519E-10 | 17,63533485 |
| ALOX5AP   | -5,200210363 | 0,869096822  | -10,65807407 | 4,70408E-12 | 4,88073E-10 | 17,50111983 |
| OLFML1    | -4,021203003 | 0,26990168   | -10,65801614 | 4,70473E-12 | 4,88073E-10 | 17,50098401 |
| MYO1F     | -4,039549504 | 1,628963933  | -10,62426668 | 5,09519E-12 | 5,25415E-10 | 17,42178935 |
| BTK       | -3,779922924 | 0,067166933  | -10,61994335 | 5,14755E-12 | 5,27654E-10 | 17,41163347 |
| CCL4      | -4,864107969 | 0,457891403  | -10,57739567 | 5,69316E-12 | 5,8013E-10  | 17,31155222 |
| EGFLAM    | -3,764503463 | 0,173261078  | -10,55601078 | 5,98939E-12 | 6,06725E-10 | 17,26115906 |
| CLEC5A    | -4,07970606  | -0,016442489 | -10,54497464 | 6,14838E-12 | 6,19189E-10 | 17,23512867 |
| CLEC1A    | -3,207508848 | -0,210009607 | -10,53870075 | 6,24069E-12 | 6,24831E-10 | 17,22032347 |
| SULF1     | -6,199735594 | 3,167045414  | -10,51900809 | 6,53972E-12 | 6,50986E-10 | 17,17381837 |
| SIRPG     | -3,242091026 | -0,343626254 | -10,51250968 | 6,64159E-12 | 6,57326E-10 | 17,15846069 |
| ZEB1      | -4,24562681  | 1,706267938  | -10,50740858 | 6,72269E-12 | 6,61551E-10 | 17,14640132 |
| TEK       | -4,155390403 | 0,166776535  | -10,46260619 | 7,47994E-12 | 7,3142E-10  | 17,04033549 |
| CLEC10A   | -3,225750804 | -0,494872931 | -10,46049862 | 7,51764E-12 | 7,3142E-10  | 17,03533938 |
| JAM3      | -4,453439345 | 0,73412396   | -10,43827022 | 7,92729E-12 | 7,66943E-10 | 16,98260942 |
| COL5A1    | -6,322382238 | 2,432825461  | -10,428624   | 8,1121E-12  | 7,80438E-10 | 16,95970617 |
| SIGLEC1   | -4,20351705  | 0,322141298  | -10,42624878 | 8,15828E-12 | 7,8052E-10  | 16,95406471 |
| ADAMTS2   | -5,296119701 | 1,247071415  | -10,4081866  | 8,51834E-12 | 8,10466E-10 | 16,9111399  |
| SLA2      | -3,128620785 | -0,262411933 | -10,3602382  | 9,55512E-12 | 9,03471E-10 | 16,796978   |
| HSPA7     | -3,857742097 | 0,270929037  | -10,35825036 | 9,60078E-12 | 9,03471E-10 | 16,79223842 |
| RPL19P12  | -2,843771315 | 1,121854586  | -10,34268042 | 9,96629E-12 | 9,32769E-10 | 16,75509688 |
| THBD      | -4,216913071 | 0,634188802  | -10,29347437 | 1,12177E-11 | 1,04422E-09 | 16,63750332 |
| HAND2     | -3,350555962 | -0,432470352 | -10,2770532  | 1,16702E-11 | 1,0763E-09  | 16,59818724 |
| COX7A1    | -3,781643124 | 0,067156788  | -10,27644603 | 1,16873E-11 | 1,0763E-09  | 16,59673284 |
| TAGAP     | -3,951652228 | 0,133128558  | -10,2722158  | 1,18071E-11 | 1,08154E-09 | 16,58659846 |
| EXOC3L2   | -2,619128911 | -0,554551297 | -10,25813274 | 1,22148E-11 | 1,10988E-09 | 16,55284225 |
| KLRB1     | -3,744555077 | -0,235470794 | -10,25709596 | 1,22454E-11 | 1,10988E-09 | 16,5503561  |
| CYBB      | -5,155146861 | 2,063661764  | -10,2473436  | 1,25369E-11 | 1,12778E-09 | 16,52696333 |
| PTPN7     | -4,314827763 | 0,834992941  | -10,24559848 | 1,25898E-11 | 1,12778E-09 | 16,522776   |
| OR51E1    | -2,994746267 | -0,406229451 | -10,24397383 | 1,26393E-11 | 1,12778E-09 | 16,51887735 |
| CD8A      | -4,607243577 | 1,59159468   | -10,1862403  | 1,45322E-11 | 1,28999E-09 | 16,38010449 |
| KCNMB1    | -4,121464138 | 0,034963334  | -10,17250302 | 1,50238E-11 | 1,32679E-09 | 16,34701834 |
| WNT2      | -4,757558123 | 1,290514149  | -10,17014661 | 1,51098E-11 | 1,32758E-09 | 16,34134037 |
| GPR183    | -4,433634316 | 0,333089877  | -10,16005903 | 1,54838E-11 | 1,35354E-09 | 16,31702511 |
| PPP1R16B  | -3,722124947 | 0,149227812  | -10,11738926 | 1,71734E-11 | 1,49365E-09 | 16,21402132 |
| DTX1      | -3,255239176 | -0,021988605 | -10,10392706 | 1,77447E-11 | 1,53559E-09 | 16,18147292 |
| PECAM1    | -5,379243006 | 2,616952847  | -10,10152774 | 1,78485E-11 | 1,53685E-09 | 16,17566936 |
| MAGI2-AS3 | -3,65070467  | 0,102182403  | -10,09788197 | 1,80075E-11 | 1,54282E-09 | 16,16684936 |
| ATP8B4    | -3,077365307 | 0,02103526   | -10,08849774 | 1,84234E-11 | 1,57064E-09 | 16,1441384  |
| MRGPRF    | -3,569299122 | 0,332786388  | -10,03457681 | 2,10109E-11 | 1,77443E-09 | 16,01341288 |
| NRXN2     | -3,685556939 | 0,086081023  | -10,03440147 | 2,10199E-11 | 1,77443E-09 | 16,01298717 |
| WAS       | -3,380386859 | 1,090503758  | -10,02889612 | 2,13043E-11 | 1,78966E-09 | 15,9996178  |
| IRF4      | -3,271958314 | -0,400018112 | -10,01972783 | 2,17866E-11 | 1,8213E-09  | 15,97734418 |
| ABCC9     | -3,492789504 | -0,251609511 | -10,01311781 | 2,21413E-11 | 1,84201E-09 | 15,96127861 |
| C3orf72   | -3,353900168 | -0,163183331 | -9,993155594 | 2,32487E-11 | 1,92484E-09 | 15,91272491 |
| MNDA      | -4,216146871 | 0,000325103  | -9,98933365  | 2,34671E-11 | 1,93362E-09 | 15,90342272 |



|                   |              |              |              |             |             |             |
|-------------------|--------------|--------------|--------------|-------------|-------------|-------------|
| PCDH12            | -3,546700074 | 0,034237479  | -9,966025423 | 2,48452E-11 | 2,03742E-09 | 15,84665039 |
| LSP1              | -4,817914387 | 1,927639155  | -9,960977267 | 2,51544E-11 | 2,04446E-09 | 15,83434482 |
| CCR1              | -3,805104746 | 0,87805979   | -9,960748831 | 2,51684E-11 | 2,04446E-09 | 15,8337879  |
| MYH11             | -6,177888149 | 1,641745924  | -9,916708512 | 2,804E-11   | 2,26703E-09 | 15,72628613 |
| SIGLEC7           | -2,699674688 | -0,757910989 | -9,912801502 | 2,83104E-11 | 2,27819E-09 | 15,71673651 |
| THY1              | -6,160316113 | 2,537175855  | -9,893752638 | 2,96674E-11 | 2,37629E-09 | 15,67014722 |
| TMEM119           | -3,891483035 | 0,347954699  | -9,877657098 | 3,08658E-11 | 2,46083E-09 | 15,63074286 |
| HCST              | -3,328686763 | 0,599052599  | -9,848909069 | 3,31306E-11 | 2,62923E-09 | 15,56027609 |
| NCF1              | -3,594415094 | 0,232389395  | -9,810247209 | 3,64469E-11 | 2,87652E-09 | 15,46533244 |
| CD28              | -3,186662041 | -0,455792887 | -9,808762493 | 3,65808E-11 | 2,87652E-09 | 15,46168233 |
| GVINP1            | -3,367514922 | -0,243093667 | -9,806563591 | 3,67801E-11 | 2,87904E-09 | 15,45627587 |
| GAB3              | -2,961984898 | 0,058032961  | -9,781574199 | 3,91239E-11 | 3,04866E-09 | 15,3947883  |
| FOXF1             | -3,128555663 | -0,439813021 | -9,773471158 | 3,99162E-11 | 3,09639E-09 | 15,37483226 |
| SAMSN1            | -4,601610329 | 0,397139818  | -9,742533816 | 4,30952E-11 | 3,32799E-09 | 15,29855857 |
| CCL5              | -5,123547936 | 2,4113772    | -9,718199396 | 4,57766E-11 | 3,51928E-09 | 15,23847293 |
| LOC100130<br>231  | -2,677148076 | -0,769174295 | -9,706340656 | 4,71445E-11 | 3,59279E-09 | 15,20916275 |
| C16orf54          | -2,813991081 | -0,67472459  | -9,706293304 | 4,71501E-11 | 3,59279E-09 | 15,20904568 |
| FAM162B           | -2,445244714 | -0,862311888 | -9,686165717 | 4,95683E-11 | 3,76042E-09 | 15,15925447 |
| IL7R              | -4,800806008 | 0,907512861  | -9,63043819  | 5,69465E-11 | 4,30121E-09 | 15,02111109 |
| TARP              | -3,091182734 | -0,562156966 | -9,625319068 | 5,76782E-11 | 4,33745E-09 | 15,0084002  |
| GIMAP1-<br>GIMAP5 | -3,646483373 | -0,253478865 | -9,620322353 | 5,84016E-11 | 4,37276E-09 | 14,99598984 |
| ZNF683            | -2,89682661  | -0,659335028 | -9,583811729 | 6,3977E-11  | 4,76947E-09 | 14,90520583 |
| CETP              | -2,324759223 | -0,877725639 | -9,546049156 | 7,0317E-11  | 5,21952E-09 | 14,81111935 |
| OLR1              | -4,062961302 | 0,00092936   | -9,430836737 | 9,39212E-11 | 6,9417E-09  | 14,52287455 |
| SELP              | -2,980841027 | -0,562877889 | -9,417860534 | 9,7044E-11  | 7,14186E-09 | 14,49029775 |
| HTR2B             | -3,798028707 | 0,243759883  | -9,401373243 | 1,01165E-10 | 7,41348E-09 | 14,44887362 |
| SCIMP             | -2,877641672 | -0,550297194 | -9,397774307 | 1,02088E-10 | 7,44942E-09 | 14,43982645 |
| CD300LF           | -3,314262727 | -0,38037306  | -9,373927764 | 1,08426E-10 | 7,8785E-09  | 14,3798359  |
| GNG2              | -4,426718919 | 0,887814068  | -9,337494193 | 1,18894E-10 | 8,60284E-09 | 14,28803236 |
| HNRNPKP3          | -2,505125902 | -0,855185382 | -9,315968545 | 1,25558E-10 | 9,04701E-09 | 14,23370912 |
| ZAP70             | -3,409122524 | 0,437044831  | -9,286751006 | 1,35218E-10 | 9,70245E-09 | 14,1598745  |
| FCGR1B            | -2,861566548 | -0,608461733 | -9,240985245 | 1,51898E-10 | 1,08541E-08 | 14,04399083 |
| GIMAP5            | -4,110729541 | 0,070802777  | -9,213932095 | 1,62732E-10 | 1,15802E-08 | 13,97535718 |
| COL6A2            | -6,201470865 | 3,350693727  | -9,205434643 | 1,66295E-10 | 1,1785E-08  | 13,95377894 |
| FGF1              | -3,367289765 | 0,509163549  | -9,167396052 | 1,83246E-10 | 1,29331E-08 | 13,85706592 |
| KIAA1755          | -3,406654249 | 0,085929529  | -9,159361921 | 1,87046E-10 | 1,31475E-08 | 13,83661436 |
| KDR               | -4,316053886 | 1,27277224   | -9,130071054 | 2,01596E-10 | 1,41125E-08 | 13,76197882 |
| HIC1              | -3,44773281  | 0,177245276  | -9,115733885 | 2,09133E-10 | 1,45809E-08 | 13,72540469 |
| MRC1              | -3,829150221 | 0,12575944   | -9,109492143 | 2,12503E-10 | 1,47089E-08 | 13,70947341 |
| BATF              | -3,228284539 | -0,033677813 | -9,108141666 | 2,1324E-10  | 1,47089E-08 | 13,7060258  |
| RASGRP2           | -3,05647192  | -0,312613463 | -9,107607761 | 2,13532E-10 | 1,47089E-08 | 13,70466274 |
| CD34              | -4,330739302 | 2,250498487  | -9,066206957 | 2,37454E-10 | 1,62916E-08 | 13,5988501  |
| ZNF469            | -3,151279368 | -0,116339649 | -9,059496792 | 2,41582E-10 | 1,6509E-08  | 13,58167863 |
| BCL6B             | -3,177294852 | 0,531193461  | -9,036738259 | 2,56133E-10 | 1,74342E-08 | 13,52339431 |
| SYNPO2            | -4,878435453 | 1,799742126  | -9,025466095 | 2,63668E-10 | 1,78765E-08 | 13,49450087 |
| CD209             | -2,790590072 | -0,671212553 | -9,020756019 | 2,66883E-10 | 1,80235E-08 | 13,48242272 |
| NRIP2             | -2,825638196 | -0,694929235 | -8,992057067 | 2,87356E-10 | 1,93303E-08 | 13,40876559 |
| P2RY14            | -3,270942497 | -0,472277085 | -8,971701557 | 3,02842E-10 | 2,02928E-08 | 13,35645585 |
| APOE              | -4,091510249 | 4,023385541  | -8,94492084  | 3,24522E-10 | 2,16493E-08 | 13,28755071 |
| CDH13             | -4,160649274 | 0,12311391   | -8,943332849 | 3,25856E-10 | 2,16493E-08 | 13,28346192 |
| ECSCR             | -3,625858231 | 0,563613636  | -8,940699432 | 3,2808E-10  | 2,16493E-08 | 13,2766806  |
| CTSW              | -3,610712126 | 0,343141139  | -8,940658958 | 3,28115E-10 | 2,16493E-08 | 13,27657637 |

|                 |              |              |              |             |             |             |
|-----------------|--------------|--------------|--------------|-------------|-------------|-------------|
| MMP9            | -5,259518313 | 1,461417678  | -8,91334677  | 3,52125E-10 | 2,31448E-08 | 13,20619032 |
| TRPC4           | -2,679075883 | -0,607653914 | -8,909769252 | 3,554E-10   | 2,32186E-08 | 13,19696339 |
| BHLHE22         | -2,566951986 | -0,82427234  | -8,909178832 | 3,55944E-10 | 2,32186E-08 | 13,19544046 |
| LOC100506776    | -2,523675983 | -0,777407016 | -8,902993692 | 3,61688E-10 | 2,35043E-08 | 13,17948363 |
| ACVRL1          | -4,322885638 | 1,541375697  | -8,899341286 | 3,65125E-10 | 2,36384E-08 | 13,17005854 |
| LILRA6          | -2,814115308 | -0,700690679 | -8,896759651 | 3,67574E-10 | 2,37078E-08 | 13,16339552 |
| ACTA2           | -5,00622035  | 4,375001807  | -8,8705146   | 3,93443E-10 | 2,52817E-08 | 13,09560884 |
| CD14            | -4,276048504 | 2,735375729  | -8,85992487  | 4,044E-10   | 2,58891E-08 | 13,06823152 |
| LYL1            | -2,624598284 | -0,303988285 | -8,844472612 | 4,20949E-10 | 2,68487E-08 | 13,02825665 |
| CNTN4           | -3,589092585 | -0,31320204  | -8,82248152  | 4,45699E-10 | 2,83224E-08 | 12,97131154 |
| GPR171          | -2,75118492  | -0,732155873 | -8,81868919  | 4,50114E-10 | 2,84979E-08 | 12,961485   |
| CCR2            | -3,134052669 | -0,540721998 | -8,817102281 | 4,51975E-10 | 2,85109E-08 | 12,9573725  |
| PXDN            | -4,852009063 | 1,917676537  | -8,81239742  | 4,57539E-10 | 2,86714E-08 | 12,94517782 |
| CD96            | -3,745646063 | 0,935681104  | -8,812135799 | 4,5785E-10  | 2,86714E-08 | 12,94449963 |
| LILRB5          | -2,466525595 | -0,874485535 | -8,802896009 | 4,68988E-10 | 2,92625E-08 | 12,92054192 |
| GZMH            | -3,812705092 | -0,201395787 | -8,784138865 | 4,92456E-10 | 3,06158E-08 | 12,87187225 |
| MEF2C           | -4,213283527 | 1,284223277  | -8,762928262 | 5,2044E-10  | 3,22392E-08 | 12,81678077 |
| HAPLN1          | -5,038951989 | 1,072896652  | -8,756917238 | 5,28661E-10 | 3,26311E-08 | 12,80115726 |
| ITGA11          | -4,082590154 | 0,405640051  | -8,720966709 | 5,80672E-10 | 3,57134E-08 | 12,70761772 |
| VIPR2           | -2,812189517 | -0,677249614 | -8,701617088 | 6,10795E-10 | 3,74324E-08 | 12,65720192 |
| CMKLR1          | -3,5591721   | 0,474709472  | -8,688016096 | 6,32917E-10 | 3,86506E-08 | 12,62173497 |
| WISP1           | -4,155772722 | 0,960637577  | -8,684446546 | 6,38857E-10 | 3,88755E-08 | 12,61242274 |
| CD7             | -3,043501676 | 0,535412623  | -8,658173215 | 6,84364E-10 | 4,1498E-08  | 12,5438298  |
| LY96            | -3,778940482 | 0,251401571  | -8,655068766 | 6,89955E-10 | 4,16902E-08 | 12,53571893 |
| NUDT10          | -3,025065117 | -0,566489341 | -8,645309657 | 7,07835E-10 | 4,26211E-08 | 12,51021352 |
| DIO2            | -4,68967287  | 2,52160994   | -8,631751653 | 7,33462E-10 | 4,40103E-08 | 12,47475911 |
| TFEC            | -3,455141562 | -0,100729894 | -8,626185213 | 7,44255E-10 | 4,45028E-08 | 12,46019585 |
| MIR143HG        | -3,960169892 | 0,403470486  | -8,623238956 | 7,50033E-10 | 4,46932E-08 | 12,45248604 |
| IL12RB1         | -2,708067104 | -0,557231068 | -8,618113794 | 7,60194E-10 | 4,51424E-08 | 12,43907175 |
| SLC2A3          | -5,133722251 | 2,020165581  | -8,61032728  | 7,759E-10   | 4,59167E-08 | 12,41868526 |
| SIGLEC14        | -2,863272628 | -0,676112019 | -8,567791497 | 8,67722E-10 | 5,11748E-08 | 12,30718008 |
| HTRA3           | -4,119295635 | 1,371357533  | -8,563653445 | 8,77226E-10 | 5,15588E-08 | 12,2963199  |
| SP140           | -3,214903438 | 0,028742235  | -8,561629028 | 8,81915E-10 | 5,1658E-08  | 12,29100607 |
| RNASEK-C17orf49 | -4,035932143 | 1,152313262  | -8,559833497 | 8,86094E-10 | 5,17269E-08 | 12,2862926  |
| HOXD9           | -4,089784698 | 0,886396937  | -8,558296479 | 8,89688E-10 | 5,17612E-08 | 12,28225742 |
| F13A1           | -4,794870079 | 1,442639601  | -8,548880743 | 9,12029E-10 | 5,28824E-08 | 12,25753134 |
| TBX21           | -2,134671271 | -0,907264549 | -8,529076505 | 9,60904E-10 | 5,55293E-08 | 12,20548727 |
| MFNG            | -3,093561781 | 1,39531282   | -8,516076456 | 9,9443E-10  | 5,72745E-08 | 12,17129659 |
| ACAN            | -3,216760484 | -0,478943058 | -8,509058369 | 1,01302E-09 | 5,81508E-08 | 12,15282967 |
| NCF1C           | -2,975925944 | -0,352682446 | -8,485442079 | 1,07822E-09 | 6,1688E-08  | 12,09064079 |
| RCSD1           | -4,11587971  | 0,868422156  | -8,457344306 | 1,16139E-09 | 6,62264E-08 | 12,01655744 |
| ABCG2           | -3,148421491 | -0,13152089  | -8,449060504 | 1,18714E-09 | 6,74711E-08 | 11,99469681 |
| ALDH1A2         | -3,875206908 | 1,033267689  | -8,432340738 | 1,24089E-09 | 7,0294E-08  | 11,95054725 |
| MMP11           | -3,869175331 | 5,829341996  | -8,420664449 | 1,27989E-09 | 7,19594E-08 | 11,9196941  |
| APOC1           | -4,799226042 | 3,117208197  | -8,420652138 | 1,27993E-09 | 7,19594E-08 | 11,91966156 |
| ICOS            | -2,752707077 | -0,731394794 | -8,419800219 | 1,28283E-09 | 7,19594E-08 | 11,91740978 |
| AOAH            | -3,088350271 | 0,02035977   | -8,416219462 | 1,29506E-09 | 7,241E-08   | 11,90794419 |
| CCL18           | -4,272847029 | 0,127855778  | -8,402345852 | 1,34361E-09 | 7,48812E-08 | 11,87125437 |
| MMP12           | -5,678432666 | 1,048759813  | -8,388174209 | 1,39511E-09 | 7,75007E-08 | 11,83375106 |
| UBASH3A         | -2,114119885 | -0,757986633 | -8,36105799  | 1,49933E-09 | 8,30224E-08 | 11,76192046 |
| IL2RA           | -3,590111577 | -0,24338657  | -8,313673706 | 1,70086E-09 | 9,38786E-08 | 11,63617604 |
| CD33            | -2,733560254 | -0,684269868 | -8,312477893 | 1,70629E-09 | 9,38786E-08 | 11,63299902 |

|          |              |              |              |             |             |             |
|----------|--------------|--------------|--------------|-------------|-------------|-------------|
| LPL      | -3,092016041 | 0,27315618   | -8,299181448 | 1,76785E-09 | 9,69558E-08 | 11,59766102 |
| FCGR1C   | -3,603575038 | -0,197209358 | -8,280885409 | 1,85627E-09 | 1,01265E-07 | 11,54899915 |
| CXCR3    | -2,646550398 | -0,602516262 | -8,280500497 | 1,85818E-09 | 1,01265E-07 | 11,54797495 |
| GUCY1A2  | -3,7268095   | 0,614722915  | -8,277664864 | 1,87229E-09 | 1,01712E-07 | 11,54042912 |
| HBB      | -5,367833292 | 0,666026895  | -8,260574516 | 1,95971E-09 | 1,06126E-07 | 11,49492906 |
| FOLR2    | -3,223497584 | -0,219542055 | -8,239307843 | 2,07432E-09 | 1,11981E-07 | 11,43825908 |
| LUM      | -7,106702301 | 3,976245145  | -8,235476159 | 2,09569E-09 | 1,12781E-07 | 11,42804264 |
| OSCAR    | -2,463651393 | -0,140944361 | -8,163610585 | 2,5406E-09  | 1,36298E-07 | 11,23608774 |
| TIE1     | -4,219908044 | 1,127561578  | -8,158664297 | 2,57455E-09 | 1,3769E-07  | 11,22285245 |
| MAGEH1   | -3,683646827 | 0,606676096  | -8,156159693 | 2,59191E-09 | 1,3819E-07  | 11,21614946 |
| P2RY13   | -3,283328087 | -0,466084289 | -8,130900935 | 2,77385E-09 | 1,47434E-07 | 11,14850694 |
| PDGFRA   | -4,61800076  | 1,831925364  | -8,12392196  | 2,82637E-09 | 1,49763E-07 | 11,12980346 |
| ACAP1    | -3,208564532 | 1,152463088  | -8,108217681 | 2,9483E-09  | 1,55433E-07 | 11,08769444 |
| LYZ      | -5,442084959 | 3,032029891  | -8,107821505 | 2,95144E-09 | 1,55433E-07 | 11,08663175 |
| MS4A14   | -2,548077974 | -0,833709346 | -8,100763851 | 3,00802E-09 | 1,5793E-07  | 11,06769731 |
| CSF3R    | -4,336017714 | 0,623328253  | -8,074474095 | 3,22868E-09 | 1,69E-07    | 10,99711271 |
| HBA2     | -4,34468438  | 0,751508497  | -8,052592615 | 3,42486E-09 | 1,78726E-07 | 10,9382992  |
| SLAMF1   | -2,73890043  | -0,683848188 | -8,041723438 | 3,52677E-09 | 1,83488E-07 | 10,90906305 |
| GSPT2    | -2,563033361 | -0,713357771 | -8,032106668 | 3,61951E-09 | 1,87506E-07 | 10,88318365 |
| KLHL6    | -3,416581129 | 0,662864791  | -8,03146653  | 3,62577E-09 | 1,87506E-07 | 10,88146059 |
| EDNRB    | -3,362632861 | -0,290356567 | -8,012131178 | 3,82014E-09 | 1,96966E-07 | 10,82939225 |
| CD4      | -4,734147497 | 2,351463728  | -7,999293821 | 3,95502E-09 | 2,03311E-07 | 10,79479734 |
| GZMK     | -3,988364977 | -0,045062519 | -7,996881188 | 3,9809E-09  | 2,04033E-07 | 10,7882934  |
| FLJ44635 | -2,249140098 | 1,050184406  | -7,992122436 | 4,03246E-09 | 2,06062E-07 | 10,77546276 |
| CLEC4A   | -3,096196996 | 0,122103721  | -7,979606156 | 4,17133E-09 | 2,12528E-07 | 10,74170305 |
| EXOC3L1  | -2,150814916 | -0,716788933 | -7,969914188 | 4,2822E-09  | 2,17457E-07 | 10,71554826 |
| GPR34    | -3,18447152  | -0,453667151 | -7,968955852 | 4,29333E-09 | 2,17457E-07 | 10,71296148 |
| ECM2     | -3,491474114 | -0,028165582 | -7,966137788 | 4,32621E-09 | 2,1848E-07  | 10,70535418 |
| FOXL2    | -2,996462812 | -0,251096747 | -7,959111698 | 4,40931E-09 | 2,22026E-07 | 10,68638327 |
| SEMA6B   | -3,155002909 | 0,297543588  | -7,952653066 | 4,48713E-09 | 2,25286E-07 | 10,66893929 |
| SH2D1A   | -3,582877271 | -0,316309697 | -7,943032476 | 4,60565E-09 | 2,30564E-07 | 10,64294595 |
| MSC      | -3,24652059  | -0,341275962 | -7,92975706  | 4,77444E-09 | 2,38321E-07 | 10,60705961 |
| ESM1     | -5,324939956 | 1,255335163  | -7,927013279 | 4,81011E-09 | 2,39407E-07 | 10,59963994 |
| PARP15   | -2,370345504 | -0,922575581 | -7,913530472 | 4,98932E-09 | 2,47611E-07 | 10,56316695 |
| ARHGDI8  | -4,462266162 | 4,194715893  | -7,908379667 | 5,05957E-09 | 2,50376E-07 | 10,54922753 |
| CD6      | -2,928063618 | 0,940439165  | -7,893456749 | 5,26881E-09 | 2,59983E-07 | 10,50882435 |
| CPXM1    | -4,899706366 | 2,145237536  | -7,891079444 | 5,30295E-09 | 2,6092E-07  | 10,50238545 |
| CD248    | -4,707177395 | 1,428840856  | -7,857237862 | 5,814E-09   | 2,85251E-07 | 10,41065318 |
| RGS18    | -2,723060764 | -0,746217951 | -7,854659262 | 5,85494E-09 | 2,85937E-07 | 10,40365797 |
| PVRIG    | -2,434610432 | -0,700202922 | -7,854266778 | 5,86119E-09 | 2,85937E-07 | 10,40259317 |
| LMOD1    | -4,158518669 | 0,86306976   | -7,812169618 | 6,57327E-09 | 3,19769E-07 | 10,28827942 |
| GPR84    | -2,893748541 | -0,47172956  | -7,797670975 | 6,83837E-09 | 3,31728E-07 | 10,24886055 |
| KCNJ8    | -3,373601737 | 0,266366946  | -7,780757299 | 7,16139E-09 | 3,46422E-07 | 10,20284463 |
| TRPV2    | -3,407831617 | 0,807195485  | -7,770988442 | 7,35498E-09 | 3,5479E-07  | 10,17625196 |
| GIPC3    | -2,569052181 | -0,402514863 | -7,767426198 | 7,42689E-09 | 3,57258E-07 | 10,16655209 |
| ITM2A    | -3,940888265 | 0,436216837  | -7,750864248 | 7,77071E-09 | 3,72756E-07 | 10,12143514 |
| HLA-G    | -3,378640367 | 0,461082658  | -7,730494304 | 8,21586E-09 | 3,93015E-07 | 10,06590114 |
| CADPS    | -2,856121492 | -0,519054718 | -7,701251248 | 8,90061E-09 | 4,24591E-07 | 9,986093005 |
| CD300A   | -4,035140611 | 1,086294027  | -7,681407383 | 9,39803E-09 | 4,47081E-07 | 9,931880616 |
| ASPN     | -4,518031303 | 0,404014194  | -7,679622314 | 9,44414E-09 | 4,48037E-07 | 9,927001694 |
| IL2RG    | -4,549249198 | 2,194596451  | -7,671084715 | 9,66786E-09 | 4,57391E-07 | 9,903661846 |
| EMR2     | -3,254592594 | 0,394052774  | -7,667885601 | 9,75307E-09 | 4,60158E-07 | 9,894914057 |
| RNASE6   | -3,180673108 | 1,176880349  | -7,625848384 | 1,09463E-08 | 5,15043E-07 | 9,779857861 |

|              |              |              |              |             |             |             |
|--------------|--------------|--------------|--------------|-------------|-------------|-------------|
| CCND2        | -4,469397033 | 2,055180746  | -7,602013738 | 1,16876E-08 | 5,48426E-07 | 9,71453361  |
| SRPX2        | -3,656233318 | 1,003350321  | -7,591815533 | 1,20202E-08 | 5,62499E-07 | 9,686563635 |
| TCEAL7       | -3,168406333 | -0,400521932 | -7,571867574 | 1,26988E-08 | 5,92644E-07 | 9,631820018 |
| DAB2         | -4,707023576 | 2,05186807   | -7,553711932 | 1,33502E-08 | 6,21361E-07 | 9,581956581 |
| DLL4         | -3,712760948 | 1,384995552  | -7,54038228  | 1,38499E-08 | 6,42883E-07 | 9,545324183 |
| HEPH         | -3,965445498 | 1,599866853  | -7,538384892 | 1,39264E-08 | 6,44697E-07 | 9,53983329  |
| CTSK         | -2,715361979 | 3,830915885  | -7,524504368 | 1,44701E-08 | 6,68068E-07 | 9,501663076 |
| LPXN         | -1,588263633 | 3,240789623  | -7,513404868 | 1,49203E-08 | 6,8701E-07  | 9,471125173 |
| CCM2L        | -2,721167605 | -0,490700946 | -7,510542003 | 1,50387E-08 | 6,90616E-07 | 9,463246417 |
| FCGR2C       | -3,068267334 | -0,550800578 | -7,499910194 | 1,54868E-08 | 7,09304E-07 | 9,43397926  |
| ADAMTS4      | -3,747918622 | 0,816708628  | -7,498229647 | 1,55589E-08 | 7,10714E-07 | 9,429351932 |
| FOXP3        | -2,167521678 | 0,248112995  | -7,472155791 | 1,67216E-08 | 7,61805E-07 | 9,357519006 |
| PDE1B        | -2,683759398 | -0,631735098 | -7,458524409 | 1,73642E-08 | 7,88993E-07 | 9,319935432 |
| RFTN1        | -3,953432207 | 2,069307153  | -7,447838533 | 1,78854E-08 | 8,10537E-07 | 9,290458966 |
| HSPA12B      | -2,918513828 | -0,283171588 | -7,436566879 | 1,84524E-08 | 8,34037E-07 | 9,259353319 |
| PYHIN1       | -2,452195939 | -0,814945742 | -7,422382823 | 1,91919E-08 | 8,65191E-07 | 9,220191106 |
| ELK2AP       | -5,289296691 | 0,536900013  | -7,414697821 | 1,9605E-08  | 8,81509E-07 | 9,198963797 |
| ADAMDEC<br>1 | -4,021473042 | -0,097011812 | -7,402467339 | 2,02812E-08 | 9,09539E-07 | 9,165168078 |
| FCN1         | -2,644081612 | -0,785707527 | -7,397430019 | 2,05666E-08 | 9,1994E-07  | 9,151244135 |
| NCF1B        | -2,625021383 | -0,558447633 | -7,394378585 | 2,07414E-08 | 9,25357E-07 | 9,142808183 |
| SIT1         | -2,729178839 | -0,527241253 | -7,388314692 | 2,10933E-08 | 9,37196E-07 | 9,126041091 |
| TMEM130      | -2,48253781  | -0,761597335 | -7,387933867 | 2,11156E-08 | 9,37196E-07 | 9,124987952 |
| TLR7         | -2,679397532 | -0,630299585 | -7,382173607 | 2,14559E-08 | 9,4985E-07  | 9,109056584 |
| PLCL1        | -2,203945161 | -0,587883513 | -7,376811251 | 2,17776E-08 | 9,61622E-07 | 9,094222559 |
| SGIP1        | -3,321469358 | 0,209317746  | -7,372306732 | 2,20517E-08 | 9,71233E-07 | 9,081759243 |
| SLCO2B1      | -4,191591211 | 1,365003672  | -7,335597648 | 2,44197E-08 | 1,07278E-06 | 8,980111246 |
| GNGT2        | -2,180874263 | -0,74189871  | -7,296449299 | 2,72303E-08 | 1,19321E-06 | 8,871553993 |
| LAMC3        | -3,86859022  | 0,947549658  | -7,279907658 | 2,85144E-08 | 1,24631E-06 | 8,825636909 |
| MGP          | -5,116295236 | 4,155588571  | -7,259691722 | 3,01675E-08 | 1,31523E-06 | 8,769482466 |
| RNASE2       | -2,090824736 | -1,062335965 | -7,25034185  | 3,09646E-08 | 1,34657E-06 | 8,743496938 |
| CRTAM        | -2,346412902 | -0,842641733 | -7,246913626 | 3,12622E-08 | 1,35609E-06 | 8,733966859 |
| OSM          | -3,47106035  | -0,232111261 | -7,241480983 | 3,17397E-08 | 1,37334E-06 | 8,718862283 |
| JAK3         | -3,70155945  | 1,571388863  | -7,233312377 | 3,24717E-08 | 1,40149E-06 | 8,696145185 |
| DOCK10       | -3,29379013  | 1,179404775  | -7,228143044 | 3,29437E-08 | 1,41831E-06 | 8,681765659 |
| CD80         | -2,190616632 | -0,896258544 | -7,217450213 | 3,39423E-08 | 1,45766E-06 | 8,65201289  |
| EDNRA        | -3,89443414  | 1,18785897   | -7,213610466 | 3,43084E-08 | 1,46971E-06 | 8,641326003 |
| CXorf21      | -2,284936645 | -0,965280011 | -7,184120693 | 3,72563E-08 | 1,59204E-06 | 8,559200163 |
| ARHGEF6      | -3,38850526  | 1,460440632  | -7,170947944 | 3,86548E-08 | 1,64771E-06 | 8,522487552 |
| LDB2         | -3,988942083 | 1,293130419  | -7,163775358 | 3,94385E-08 | 1,67696E-06 | 8,50249026  |
| LRRN4CL      | -2,927296367 | 0,245288684  | -7,138900896 | 4,22835E-08 | 1,79351E-06 | 8,433100673 |
| SHE          | -2,508576102 | -0,216703853 | -7,1357276   | 4,26611E-08 | 1,80508E-06 | 8,424244122 |
| DENND1C      | -2,890713452 | 0,829227461  | -7,124518326 | 4,40224E-08 | 1,85811E-06 | 8,392951607 |
| PLXDC1       | -4,125022387 | 1,150262925  | -7,118529455 | 4,47677E-08 | 1,88495E-06 | 8,3762277   |
| COLEC12      | -2,922476656 | 0,322631668  | -7,091531974 | 4,82895E-08 | 2,02828E-06 | 8,300794321 |
| HPGDS        | -2,256901922 | -0,922399428 | -7,087979305 | 4,87734E-08 | 2,04362E-06 | 8,290862631 |
| ITGB2        | -4,587997363 | 2,817937336  | -7,083574459 | 4,93802E-08 | 2,06402E-06 | 8,27854696  |
| CCL4L1       | -3,175549691 | -0,496569517 | -7,068916558 | 5,14549E-08 | 2,14035E-06 | 8,23755107  |
| CCL4L2       | -3,175549691 | -0,496569517 | -7,068916558 | 5,14549E-08 | 2,14035E-06 | 8,23755107  |
| SDS          | -3,230830681 | 0,366486359  | -7,062563759 | 5,23814E-08 | 2,17364E-06 | 8,219776932 |
| TNFSF13B     | -3,09672287  | 0,703550497  | -7,034413132 | 5,66943E-08 | 2,34695E-06 | 8,140970054 |
| VCAM1        | -4,301370909 | 1,215404544  | -7,029633614 | 5,74615E-08 | 2,37301E-06 | 8,127582546 |
| LILRA1       | -1,59355545  | -1,310970608 | -7,018033315 | 5,93676E-08 | 2,44106E-06 | 8,095081057 |
| FAM78A       | -2,531679238 | 0,737279738  | -7,01788216  | 5,93928E-08 | 2,44106E-06 | 8,09465747  |

|              |              |              |              |             |             |             |
|--------------|--------------|--------------|--------------|-------------|-------------|-------------|
| PTPRCAP      | -2,685828919 | 1,741067607  | -7,011956307 | 6,03915E-08 | 2,4762E-06  | 8,078049624 |
| STX11        | -2,818784759 | -0,054592373 | -7,002264444 | 6,20617E-08 | 2,53863E-06 | 8,050880118 |
| PAMR1        | -4,295706105 | 1,928421221  | -6,974348437 | 6,71386E-08 | 2,7398E-06  | 7,972574005 |
| SOX18        | -2,522377836 | -0,103253397 | -6,970902201 | 6,77938E-08 | 2,75999E-06 | 7,96290216  |
| GPR85        | -1,83117263  | -0,866967592 | -6,965154049 | 6,89012E-08 | 2,79846E-06 | 7,946767598 |
| SCML4        | -1,83652191  | -1,16667329  | -6,957351265 | 7,04337E-08 | 2,85397E-06 | 7,924861066 |
| C1QTNF7      | -3,019887734 | -0,597804466 | -6,954837073 | 7,09348E-08 | 2,86753E-06 | 7,917801231 |
| CACNA2D4     | -2,515801534 | -0,394923862 | -6,932405501 | 7,55686E-08 | 3,04268E-06 | 7,854788332 |
| HLA-DQA1     | -5,20962391  | 3,283021378  | -6,931974273 | 7,56607E-08 | 3,04268E-06 | 7,853576521 |
| DYSF         | -2,87105293  | 1,27367826   | -6,931333134 | 7,57977E-08 | 3,04268E-06 | 7,851774801 |
| ATP1B2       | -2,474802945 | -0,605315535 | -6,907730939 | 8,10207E-08 | 3,24478E-06 | 7,785422722 |
| LAG3         | -2,995530945 | 1,301935494  | -6,905021365 | 8,16432E-08 | 3,26213E-06 | 7,777802228 |
| MEG3         | -3,874463701 | 0,149403159  | -6,90182823  | 8,23829E-08 | 3,28407E-06 | 7,76882092  |
| CORO1A       | -2,672698981 | 3,278445534  | -6,899341406 | 8,29638E-08 | 3,29958E-06 | 7,761825628 |
| NLRC4        | -2,311010782 | -0,879227959 | -6,896797385 | 8,35623E-08 | 3,31573E-06 | 7,75466888  |
| LY9          | -2,492242262 | -0,861627202 | -6,892736518 | 8,45266E-08 | 3,34628E-06 | 7,74324382  |
| TNFRSF1B     | -3,573012295 | 2,805171594  | -6,879154019 | 8,78348E-08 | 3,46928E-06 | 7,705019608 |
| RHOJ         | -3,360675106 | 1,218760764  | -6,878185039 | 8,80758E-08 | 3,47083E-06 | 7,702292066 |
| SPOCK2       | -2,37484459  | 3,507190798  | -6,875355291 | 8,87833E-08 | 3,49072E-06 | 7,694326257 |
| CXCL13       | -5,092680602 | 1,264452548  | -6,871293205 | 8,9809E-08  | 3,52301E-06 | 7,682890169 |
| COL5A2       | -3,397445018 | 4,34231704   | -6,859051593 | 9,29732E-08 | 3,63884E-06 | 7,64841743  |
| GAPT         | -2,364895003 | -0,925300831 | -6,849015491 | 9,56512E-08 | 3,73517E-06 | 7,620145841 |
| ITIH3        | -2,134128351 | -0,894999516 | -6,8414734   | 9,7715E-08  | 3,80713E-06 | 7,59889417  |
| FGD2         | -2,691893646 | 0,421506862  | -6,824211871 | 1,0261E-07  | 3,98881E-06 | 7,550237393 |
| LOC100132891 | -2,712774553 | -0,605993354 | -6,809615602 | 1,06942E-07 | 4,14784E-06 | 7,509073782 |
| PDCD1LG2     | -2,679312444 | -0,053114252 | -6,801201109 | 1,09523E-07 | 4,2384E-06  | 7,485335556 |
| NCF4         | -3,809628739 | 1,022661503  | -6,765069369 | 1,21341E-07 | 4,68522E-06 | 7,383337029 |
| ARHGEF15     | -3,133071817 | 0,55695613   | -6,735702949 | 1,31891E-07 | 5,07963E-06 | 7,30035799  |
| APLNR        | -3,036341834 | 0,420184116  | -6,73502487  | 1,32145E-07 | 5,07963E-06 | 7,298441157 |
| AIM2         | -2,822100375 | -0,464443205 | -6,721636112 | 1,37269E-07 | 5,26482E-06 | 7,260585493 |
| LYVE1        | -2,433499865 | -0,890998401 | -6,710158867 | 1,4182E-07  | 5,4273E-06  | 7,228123107 |
| TMEM255B     | -2,224367721 | -0,814968569 | -6,708110907 | 1,42648E-07 | 5,44688E-06 | 7,222329535 |
| STAT4        | -2,609624079 | 0,641321363  | -6,697395922 | 1,47061E-07 | 5,60296E-06 | 7,192011998 |
| SNX20        | -2,249729514 | -0,761280578 | -6,691244128 | 1,49656E-07 | 5,68926E-06 | 7,174601714 |
| ARHGAP15     | -3,643541236 | 0,711647291  | -6,689591278 | 1,50362E-07 | 5,70348E-06 | 7,169923453 |
| SVEP1        | -3,123259164 | 0,987667125  | -6,687910555 | 1,51082E-07 | 5,71822E-06 | 7,165166081 |
| ADORA2A      | -2,473718386 | 1,00858187   | -6,669002729 | 1,59433E-07 | 6,02105E-06 | 7,111631399 |
| GRP          | -2,40597247  | -0,834749885 | -6,666110457 | 1,60751E-07 | 6,05754E-06 | 7,103439924 |
| AQP1         | -3,208726205 | 3,182864431  | -6,648372023 | 1,69078E-07 | 6,35742E-06 | 7,053187217 |
| IL3RA        | -2,806534646 | 0,485443106  | -6,633443501 | 1,76424E-07 | 6,61915E-06 | 7,010876399 |
| S100B        | -3,082943529 | -0,293064796 | -6,631110336 | 1,776E-07   | 6,64882E-06 | 7,004262161 |
| ZNF831       | -1,935369438 | -1,003612505 | -6,617792364 | 1,84471E-07 | 6,87966E-06 | 6,966499522 |
| FCN3         | -2,474978989 | -0,736134143 | -6,617612527 | 1,84566E-07 | 6,87966E-06 | 6,96598951  |
| RAC2         | -4,554720046 | 2,029561126  | -6,613005009 | 1,87006E-07 | 6,95557E-06 | 6,952921916 |
| NLRP3        | -2,375399542 | -0,649891074 | -6,611060218 | 1,88046E-07 | 6,97917E-06 | 6,94740573  |
| MEI1         | -2,445898089 | -0,301532535 | -6,607657358 | 1,89879E-07 | 7,03206E-06 | 6,937753219 |
| POU2F2       | -2,408294367 | 0,732265349  | -6,606452373 | 1,90533E-07 | 7,04112E-06 | 6,934334969 |
| MMP19        | -3,326146102 | 0,77558807   | -6,601438633 | 1,93276E-07 | 7,12722E-06 | 6,920111052 |
| CD79B        | -2,978770735 | -0,099826635 | -6,583953864 | 2,03161E-07 | 7,47572E-06 | 6,870492554 |
| MZB1         | -3,848851147 | 0,649673485  | -6,57021039  | 2,11288E-07 | 7,75819E-06 | 6,831475544 |
| HOPX         | -4,141794936 | 2,074408741  | -6,553871068 | 2,21379E-07 | 8,11141E-06 | 6,785071398 |
| DARC         | -3,494489171 | -0,02587318  | -6,549041511 | 2,24453E-07 | 8,20661E-06 | 6,771351674 |
| SLC2A5       | -2,817178033 | 0,821127366  | -6,525730919 | 2,39912E-07 | 8,75322E-06 | 6,705108244 |

|            |              |              |              |             |             |             |
|------------|--------------|--------------|--------------|-------------|-------------|-------------|
| ENPP2      | -4,310523604 | 2,472640132  | -6,500454756 | 2,57891E-07 | 9,38932E-06 | 6,633236459 |
| TNFSF8     | -3,163036507 | -0,069234491 | -6,493089069 | 2,63383E-07 | 9,56901E-06 | 6,612284193 |
| ABCA8      | -2,922015726 | -0,580035849 | -6,485886517 | 2,68866E-07 | 9,74767E-06 | 6,591792426 |
| LAT2       | -2,9378371   | 1,514628391  | -6,476986057 | 2,75802E-07 | 9,97813E-06 | 6,566465175 |
| PPAPDC3    | -2,040819424 | -0,895612296 | -6,47052957  | 2,80946E-07 | 1,01429E-05 | 6,54808921  |
| CD1C       | -2,446682867 | -0,884406899 | -6,461460064 | 2,88336E-07 | 1,0388E-05  | 6,522271598 |
| ITGAM      | -2,972278543 | 0,680237646  | -6,43843441  | 3,07992E-07 | 1,10729E-05 | 6,45670163  |
| ISM1       | -3,319691067 | 1,465173846  | -6,413450575 | 3,30853E-07 | 1,187E-05   | 6,385516697 |
| LRRC25     | -3,040790725 | 0,380034169  | -6,412229582 | 3,32013E-07 | 1,18869E-05 | 6,382036778 |
| EMILIN1    | -3,958390382 | 1,721401078  | -6,402163915 | 3,41735E-07 | 1,22096E-05 | 6,353345336 |
| KIR2DL4    | -1,689259621 | -1,263118522 | -6,383334268 | 3,607E-07   | 1,28605E-05 | 6,29965589  |
| ADAM12     | -3,111798222 | 0,028878531  | -6,369562539 | 3,75239E-07 | 1,33512E-05 | 6,260374438 |
| C1orf54    | -2,746451767 | 1,751647316  | -6,354236977 | 3,92116E-07 | 1,39229E-05 | 6,216647488 |
| STMN2      | -2,017842009 | -0,916191178 | -6,351122836 | 3,95637E-07 | 1,40191E-05 | 6,207760494 |
| CCDC102B   | -2,249178052 | -0,380374932 | -6,33929937  | 4,09302E-07 | 1,44735E-05 | 6,174014006 |
| GJD3       | -1,801385481 | 0,516547766  | -6,318618949 | 4,34356E-07 | 1,5328E-05  | 6,114968412 |
| PIK3R6     | -2,264031795 | -0,653077445 | -6,317371927 | 4,35916E-07 | 1,53515E-05 | 6,111407196 |
| PIEZO2     | -1,899633427 | -1,157931619 | -6,28144913  | 4,83343E-07 | 1,6987E-05  | 6,008782006 |
| LOC158376  | -1,677715076 | -1,192103797 | -6,270835407 | 4,98327E-07 | 1,7478E-05  | 5,978446748 |
| RAPGEF4    | -2,094769218 | 0,585001605  | -6,26336812  | 5,09149E-07 | 1,78213E-05 | 5,957100704 |
| TAL1       | -1,915243952 | -0,911327607 | -6,253417378 | 5,2394E-07  | 1,83018E-05 | 5,928650788 |
| HBA1       | -2,927777308 | -0,314980958 | -6,24740201  | 5,3309E-07  | 1,85837E-05 | 5,911449846 |
| GREM1      | -3,950239615 | 0,377429282  | -6,244231055 | 5,37978E-07 | 1,87161E-05 | 5,902381734 |
| TRAF1      | -2,17208335  | 2,50249429   | -6,24353139  | 5,39063E-07 | 1,87161E-05 | 5,900380801 |
| HLA-DRB6   | -3,935445948 | 2,161329638  | -6,237004742 | 5,49288E-07 | 1,90328E-05 | 5,881714374 |
| DCHS1      | -2,824516287 | 2,216150082  | -6,23499341  | 5,52478E-07 | 1,91049E-05 | 5,875961452 |
| GRAP2      | -1,88513326  | -1,043548882 | -6,226554239 | 5,66068E-07 | 1,95356E-05 | 5,851820985 |
| CD244      | -2,111309102 | -0,769357098 | -6,225298442 | 5,68119E-07 | 1,95672E-05 | 5,848228432 |
| PCED1B-AS1 | -2,407904955 | -0,877767654 | -6,211889444 | 5,9049E-07  | 2,02971E-05 | 5,809863291 |
| RASGRP4    | -1,822740334 | -1,196378166 | -6,20821852  | 5,96768E-07 | 2,0472E-05  | 5,799358644 |
| PRF1       | -3,631407653 | 0,548155574  | -6,205734437 | 6,01055E-07 | 2,05621E-05 | 5,792249856 |
| ZBTB46     | -2,737732848 | 0,623991448  | -6,205314182 | 6,01783E-07 | 2,05621E-05 | 5,791047167 |
| RARRES2    | -4,003034412 | 3,580234252  | -6,199527457 | 6,11901E-07 | 2,08664E-05 | 5,774485779 |
| CLMP       | -2,648285375 | -0,412166141 | -6,197886193 | 6,14802E-07 | 2,09239E-05 | 5,76978824  |
| PDCD1      | -2,801971617 | -0,098299756 | -6,181482719 | 6,44566E-07 | 2,18936E-05 | 5,722831827 |
| KLRC1      | -2,021468232 | -1,097014217 | -6,18021636  | 6,46923E-07 | 2,19118E-05 | 5,719206218 |
| PDPN       | -3,965547207 | 1,160451418  | -6,179829147 | 6,47646E-07 | 2,19118E-05 | 5,718097605 |
| COL1A1     | -3,353715926 | 7,197402238  | -6,176478424 | 6,53932E-07 | 2,20811E-05 | 5,708503984 |
| IL18RAP    | -2,371333438 | -0,473968105 | -6,162194211 | 6,81429E-07 | 2,29645E-05 | 5,667600139 |
| CD226      | -2,086983059 | -0,638278071 | -6,147047568 | 7,11859E-07 | 2,39432E-05 | 5,6242162   |
| HAAO       | -2,547266214 | -0,235425435 | -6,144702077 | 7,16692E-07 | 2,40553E-05 | 5,617497152 |
| CLIP3      | -2,023866615 | 2,577344558  | -6,144077631 | 7,17984E-07 | 2,40553E-05 | 5,615708281 |
| SLC7A7     | -3,207009696 | 1,666888571  | -6,139778198 | 7,26946E-07 | 2,43082E-05 | 5,603391068 |
| NOVA2      | -1,830921679 | -1,023274644 | -6,135594922 | 7,35773E-07 | 2,45557E-05 | 5,591405819 |
| FAP        | -4,334173701 | 1,521727682  | -6,134474422 | 7,38156E-07 | 2,45876E-05 | 5,58819541  |
| PIK3CG     | -2,683890222 | -0,734775441 | -6,121799516 | 7,65657E-07 | 2,54234E-05 | 5,551875876 |
| PLA2G2D    | -2,940083836 | -0,568715041 | -6,121553082 | 7,66201E-07 | 2,54234E-05 | 5,551169657 |
| MEDAG      | -2,681909551 | -0,54689215  | -6,119365671 | 7,71054E-07 | 2,55352E-05 | 5,544900957 |
| AKT3       | -3,427525656 | 1,119710513  | -6,103885685 | 8,06293E-07 | 2,6651E-05  | 5,500532302 |
| LRRC32     | -3,269819233 | 2,272472648  | -6,097879618 | 8,20398E-07 | 2,70653E-05 | 5,483314963 |
| P2RY10     | -2,405097789 | -0,869389101 | -6,091608866 | 8,3539E-07  | 2,75072E-05 | 5,465337226 |
| FASLG      | -2,367735267 | -0,706220719 | -6,075716406 | 8,74633E-07 | 2,87444E-05 | 5,419767472 |
| SELPLG     | -2,398562343 | 2,159266159  | -6,072244543 | 8,8345E-07  | 2,89788E-05 | 5,409810931 |

|                  |              |              |              |             |             |             |
|------------------|--------------|--------------|--------------|-------------|-------------|-------------|
| AMPH             | -1,988285603 | -0,728702053 | -6,066166215 | 8,99102E-07 | 2,94362E-05 | 5,39237844  |
| ITGBL1           | -2,553368559 | -0,247493517 | -6,058042004 | 9,20459E-07 | 3,00782E-05 | 5,369076095 |
| ANKRD30B<br>L    | -1,926764074 | -0,856314464 | -6,048845145 | 9,45253E-07 | 3,07913E-05 | 5,342693962 |
| GABRD            | -1,668552672 | -1,097554721 | -6,048624085 | 9,45858E-07 | 3,07913E-05 | 5,342059786 |
| CYTIP            | -3,586622581 | 1,478799422  | -6,044628467 | 9,56845E-07 | 3,10902E-05 | 5,330596884 |
| WFDC1            | -2,968958667 | 0,998911576  | -6,040127711 | 9,69375E-07 | 3,14381E-05 | 5,317684067 |
| ARHGAP20         | -1,779188633 | -1,082458021 | -6,033569979 | 9,87929E-07 | 3,19796E-05 | 5,298868333 |
| CRMP1            | -2,762905492 | 0,564572928  | -6,023928088 | 1,01586E-06 | 3,2822E-05  | 5,271200446 |
| CALCRL           | -4,081104063 | 1,461649975  | -6,02196995  | 1,02163E-06 | 3,29465E-05 | 5,265581049 |
| PCDH17           | -3,444049087 | 0,38763563   | -6,002470482 | 1,0809E-06  | 3,47929E-05 | 5,209614498 |
| AEBP1            | -4,122469484 | 4,050535969  | -5,995547801 | 1,10277E-06 | 3,54306E-05 | 5,189742037 |
| FPR1             | -3,640160672 | 0,093551551  | -5,994064732 | 1,10751E-06 | 3,55166E-05 | 5,185484476 |
| SLC11A1          | -2,878485363 | 1,338948247  | -5,988009516 | 1,12709E-06 | 3,60772E-05 | 5,168100499 |
| TNFRSF9          | -2,887079724 | 0,017221549  | -5,96305083  | 1,21151E-06 | 3,87078E-05 | 5,096433256 |
| MMP3             | -4,070519181 | 0,312386149  | -5,960926    | 1,21899E-06 | 3,88745E-05 | 5,090330992 |
| TMEM176B         | -4,15800786  | 2,771660661  | -5,956798198 | 1,23364E-06 | 3,92691E-05 | 5,078476011 |
| IL18BP           | -1,688161362 | 2,406073662  | -5,949640826 | 1,25947E-06 | 4,00174E-05 | 5,057918865 |
| DKK3             | -3,662409779 | 2,600465429  | -5,946645631 | 1,27045E-06 | 4,02916E-05 | 5,049315695 |
| CCL8             | -2,68604861  | -0,35602559  | -5,940920126 | 1,29168E-06 | 4,08899E-05 | 5,032869413 |
| FLT4             | -2,946286467 | 0,681182198  | -5,911298284 | 1,40741E-06 | 4,44715E-05 | 4,947766083 |
| CD79A            | -3,225194744 | 0,396700368  | -5,90560107  | 1,43083E-06 | 4,51288E-05 | 4,931395105 |
| ARL11            | -2,46347059  | -0,534512592 | -5,897643622 | 1,46421E-06 | 4,6044E-05  | 4,908527815 |
| ADAM33           | -3,197814998 | 0,270118051  | -5,897411392 | 1,46519E-06 | 4,6044E-05  | 4,90786043  |
| PIK3R5           | -3,51126834  | 0,554973723  | -5,890812105 | 1,49348E-06 | 4,68475E-05 | 4,888894725 |
| TPSAB1           | -3,61280465  | -0,224112755 | -5,8833268   | 1,52624E-06 | 4,76365E-05 | 4,867381278 |
| MAP4K1           | -2,560038187 | 1,023393605  | -5,883169787 | 1,52693E-06 | 4,76365E-05 | 4,866929994 |
| PDE10A           | -2,514631386 | -0,120347718 | -5,870421466 | 1,58442E-06 | 4,93404E-05 | 4,83028675  |
| CPA3             | -3,574051436 | -0,320722615 | -5,867828097 | 1,59637E-06 | 4,9623E-05  | 4,822831971 |
| PSTPIP1          | -2,71235284  | 0,490313482  | -5,864954723 | 1,60973E-06 | 4,9948E-05  | 4,814572109 |
| AGAP2            | -2,384271698 | 0,246945109  | -5,857629355 | 1,64428E-06 | 5,09284E-05 | 4,793513527 |
| CCRL2            | -2,622952241 | 0,030015873  | -5,847515701 | 1,69322E-06 | 5,22212E-05 | 4,76443721  |
| VENTX            | -1,577821895 | -1,277057096 | -5,846980008 | 1,69585E-06 | 5,22212E-05 | 4,76289705  |
| LOC100499<br>405 | -2,040309413 | -0,285145509 | -5,846512763 | 1,69815E-06 | 5,22212E-05 | 4,761553676 |
| BCL2A1           | -3,995192578 | 1,146279686  | -5,841541377 | 1,72281E-06 | 5,28852E-05 | 4,747260162 |
| FCRL5            | -2,829796169 | -0,692850249 | -5,837193225 | 1,74468E-06 | 5,3461E-05  | 4,734758083 |
| ITGA8            | -1,770417397 | -1,222539635 | -5,836325002 | 1,74908E-06 | 5,35006E-05 | 4,732261662 |
| TSPYL5           | -3,374549487 | 0,108518147  | -5,828810663 | 1,78762E-06 | 5,45826E-05 | 4,710654822 |
| KLRD1            | -2,594992484 | -0,406306065 | -5,826629617 | 1,79896E-06 | 5,48318E-05 | 4,704383179 |
| JAKMIP2          | -1,617989334 | -1,024265314 | -5,823137869 | 1,81728E-06 | 5,52922E-05 | 4,69434237  |
| FMO1             | -1,819090112 | -1,061576465 | -5,821698007 | 1,82489E-06 | 5,54257E-05 | 4,690201855 |
| PRKG1            | -2,817350133 | 0,128288491  | -5,8187155   | 1,84074E-06 | 5,58089E-05 | 4,681625115 |
| LTA              | -1,511124548 | -1,002052873 | -5,812269917 | 1,87549E-06 | 5,67624E-05 | 4,663089042 |
| PIK3CD           | -2,522540525 | 1,997118906  | -5,810985168 | 1,88249E-06 | 5,68745E-05 | 4,659394286 |
| GAL3ST4          | -2,569495697 | 1,342974313  | -5,807289824 | 1,90279E-06 | 5,73869E-05 | 4,648766813 |
| GFRA1            | -2,572258248 | -0,534065916 | -5,80490311  | 1,91601E-06 | 5,76847E-05 | 4,641902696 |
| GRIK3            | -2,249006943 | -0,836378499 | -5,800593258 | 1,94012E-06 | 5,82118E-05 | 4,629507408 |
| CD300C           | -1,743947133 | -1,093863309 | -5,800565137 | 1,94028E-06 | 5,82118E-05 | 4,629426529 |
| CLIC2            | -2,505573255 | 1,911413585  | -5,794668131 | 1,97377E-06 | 5,91136E-05 | 4,612465947 |
| LILRA5           | -2,680135092 | -0,767680787 | -5,792773951 | 1,98465E-06 | 5,93167E-05 | 4,60701789  |
| TMEM156          | -1,991041921 | -0,931374964 | -5,792290048 | 1,98744E-06 | 5,93167E-05 | 4,605626073 |
| CCL21            | -3,860779097 | -0,054118549 | -5,791484866 | 1,99209E-06 | 5,93526E-05 | 4,603310173 |
| SIGLEC11         | -1,572544616 | -1,321476025 | -5,787300031 | 2,01643E-06 | 5,99741E-05 | 4,591273376 |

|                  |              |              |              |             |             |             |
|------------------|--------------|--------------|--------------|-------------|-------------|-------------|
| FAM65C           | -2,286139615 | 0,987125251  | -5,780993291 | 2,05368E-06 | 6,09767E-05 | 4,573132766 |
| LOC100505<br>702 | -2,211013657 | 0,197702925  | -5,775880698 | 2,08439E-06 | 6,17818E-05 | 4,558426461 |
| NAALADL1         | -2,628310876 | -0,266024002 | -5,763454534 | 2,16095E-06 | 6,39411E-05 | 4,522680912 |
| GBP5             | -3,86040661  | 2,561356567  | -5,760107737 | 2,18205E-06 | 6,44547E-05 | 4,513052959 |
| C5AR1            | -2,961732413 | 1,486517645  | -5,753140717 | 2,22664E-06 | 6,56591E-05 | 4,493009904 |
| APOBR            | -2,346192346 | 1,183879203  | -5,746913946 | 2,26726E-06 | 6,67428E-05 | 4,4750958   |
| SIGLEC5          | -1,995886606 | -1,10980503  | -5,725779836 | 2,41078E-06 | 7,08464E-05 | 4,41428989  |
| SLC9A9           | -2,435876156 | 0,41854432   | -5,711612528 | 2,51205E-06 | 7,35716E-05 | 4,373525195 |
| TPSB2            | -3,542590611 | -0,281716118 | -5,694804007 | 2,63777E-06 | 7,71222E-05 | 4,325157703 |
| DNAJC5B          | -2,038876992 | -0,69878135  | -5,675635841 | 2,78885E-06 | 8,12628E-05 | 4,269996701 |
| TMEM176A         | -3,691201563 | 2,369269365  | -5,675457381 | 2,7903E-06  | 8,12628E-05 | 4,269483125 |
| F2RL2            | -2,624376999 | -0,07007708  | -5,675057383 | 2,79354E-06 | 8,12628E-05 | 4,268331998 |
| LILRA2           | -1,991694765 | -1,11190095  | -5,665568373 | 2,87165E-06 | 8,3394E-05  | 4,241023853 |
| CTLA4            | -3,227927821 | 0,045301011  | -5,653868953 | 2,97097E-06 | 8,61332E-05 | 4,207353505 |
| CCL19            | -2,561583897 | -0,826956384 | -5,644296783 | 3,0548E-06  | 8,84146E-05 | 4,179804605 |
| PREX1            | -3,669806827 | 2,674248102  | -5,640588764 | 3,0879E-06  | 8,92228E-05 | 4,169132707 |
| GPR124           | -3,4917187   | 2,15807095   | -5,636650683 | 3,12346E-06 | 9,00989E-05 | 4,157798598 |
| NOTCH4           | -2,638358381 | 2,269666     | -5,634304685 | 3,14483E-06 | 9,05432E-05 | 4,151046592 |
| AVPR1A           | -2,630670732 | -0,019904193 | -5,633517812 | 3,15203E-06 | 9,05432E-05 | 4,148781891 |
| COL5A3           | -3,120608401 | 0,854453444  | -5,633234096 | 3,15463E-06 | 9,05432E-05 | 4,147965327 |
| S1PR1            | -3,212688756 | 1,458863032  | -5,632456063 | 3,16178E-06 | 9,05973E-05 | 4,145726064 |
| IGDCC4           | -2,102540053 | -0,258208235 | -5,631445985 | 3,17107E-06 | 9,07127E-05 | 4,142818948 |
| CNN1             | -3,840449095 | 1,233625038  | -5,609803202 | 3,37702E-06 | 9,6444E-05  | 4,080527666 |
| TAGLN            | -3,359023492 | 5,452321276  | -5,608457996 | 3,39026E-06 | 9,66617E-05 | 4,076655907 |
| RHOH             | -3,074380787 | 0,659019214  | -5,604799302 | 3,42652E-06 | 9,7534E-05  | 4,066125469 |
| LOC606724        | -1,644507507 | -1,05226574  | -5,598177654 | 3,49314E-06 | 9,92662E-05 | 4,047067003 |
| TLR8             | -2,445695961 | -0,884900353 | -5,592428275 | 3,55203E-06 | 0,000100726 | 4,03051906  |
| POM121L9<br>P    | -1,660075056 | -1,129096952 | -5,592022704 | 3,55622E-06 | 0,000100726 | 4,029351739 |
| C1QTNF1          | -2,550509033 | 0,730930141  | -5,587334913 | 3,60503E-06 | 0,000101941 | 4,015859248 |
| WNT5A            | -2,595925586 | 4,130298408  | -5,582771599 | 3,6532E-06  | 0,000103134 | 4,002725025 |
| PLA2G4C          | -2,051307074 | 0,245627046  | -5,581901223 | 3,66246E-06 | 0,000103226 | 4,00021989  |
| GSTM5            | -2,189274469 | -0,945926588 | -5,570491706 | 3,78603E-06 | 0,000106535 | 3,967380818 |
| HAMP             | -1,999785519 | -1,025129034 | -5,565290513 | 3,84374E-06 | 0,000107982 | 3,952410697 |
| C1S              | -3,766164993 | 4,660788931  | -5,562684555 | 3,87298E-06 | 0,000108626 | 3,944910224 |
| CD300E           | -2,540326097 | -0,837585284 | -5,539255771 | 4,14614E-06 | 0,0001158   | 3,877478254 |
| XCL2             | -2,484857484 | -0,865319591 | -5,538508099 | 4,15517E-06 | 0,0001158   | 3,87532636  |
| FAM167B          | -2,091749063 | 0,454475562  | -5,538469122 | 4,15564E-06 | 0,0001158   | 3,875214179 |
| DES              | -4,57597525  | 1,007142584  | -5,536062496 | 4,18483E-06 | 0,000116425 | 3,868287624 |
| IFNG             | -2,567666078 | -0,823915294 | -5,52901447  | 4,27153E-06 | 0,000118542 | 3,848002732 |
| FAM110D          | -1,537311365 | -0,643327637 | -5,528758386 | 4,27471E-06 | 0,000118542 | 3,847265703 |
| RAMP2            | -2,804809915 | 2,008032189  | -5,524237631 | 4,33131E-06 | 0,000119919 | 3,834254678 |
| ACTG2            | -3,56508927  | 1,879282772  | -5,505632987 | 4,57222E-06 | 0,000126386 | 3,78071064  |
| CPED1            | -3,556714666 | 0,706879112  | -5,502400807 | 4,61543E-06 | 0,000127375 | 3,771408698 |
| GJA5             | -3,000282098 | 1,170412585  | -5,477366663 | 4,96419E-06 | 0,000136781 | 3,69936556  |
| SEPT1            | -1,866480132 | 1,270468933  | -5,460586074 | 5,21263E-06 | 0,000142983 | 3,651077994 |
| CD19             | -2,08725865  | -0,609691274 | -5,460485085 | 5,21416E-06 | 0,000142983 | 3,6507874   |
| ERG              | -3,142747625 | 1,994331074  | -5,454541391 | 5,30514E-06 | 0,000145016 | 3,633684714 |
| TREM1            | -3,080484927 | -0,014297601 | -5,444431572 | 5,46355E-06 | 0,000149109 | 3,604595245 |
| BGN              | -4,690474904 | 4,34762303   | -5,443189724 | 5,48333E-06 | 0,000149314 | 3,601022109 |
| LOC441081        | -2,118245843 | 0,499893111  | -5,442871927 | 5,48841E-06 | 0,000149314 | 3,600107724 |
| CPZ              | -3,331675303 | 1,171558607  | -5,439393555 | 5,54425E-06 | 0,000150596 | 3,590099629 |
| DDR2             | -2,29954938  | 0,007793396  | -5,433734459 | 5,63633E-06 | 0,000152855 | 3,573817449 |



|           |              |              |              |             |             |             |
|-----------|--------------|--------------|--------------|-------------|-------------|-------------|
| TOX2      | -2,260025927 | -0,301195093 | -5,425241516 | 5,77739E-06 | 0,000156189 | 3,549382699 |
| FGL2      | -3,768504721 | 1,872992547  | -5,423993066 | 5,79842E-06 | 0,000156512 | 3,54579092  |
| CES1      | -3,014220881 | 0,344725052  | -5,417465038 | 5,90964E-06 | 0,000159264 | 3,527010254 |
| HTRA4     | -1,579503762 | -1,000441919 | -5,414021852 | 5,96917E-06 | 0,000160617 | 3,517104735 |
| HIGD1B    | -1,976559254 | -1,119468706 | -5,4129105   | 5,98851E-06 | 0,000160886 | 3,513907587 |
| ADAP2     | -2,699069519 | 1,325247446  | -5,394079788 | 6,32591E-06 | 0,000169494 | 3,459738519 |
| AXL       | -3,093463443 | 1,90947508   | -5,384464761 | 6,50545E-06 | 0,000173691 | 3,432082137 |
| MS4A1     | -2,910216294 | -0,652640186 | -5,375333894 | 6,68067E-06 | 0,000178093 | 3,405820079 |
| C19orf38  | -1,940031404 | -0,212150634 | -5,371114797 | 6,76323E-06 | 0,000180015 | 3,393685757 |
| ACP5      | -3,426586708 | 2,824480395  | -5,362953588 | 6,92582E-06 | 0,000184058 | 3,370214818 |
| CCR6      | -1,701439916 | -0,234144075 | -5,349651745 | 7,19925E-06 | 0,00019103  | 3,331963041 |
| ENG       | -2,945197517 | 4,373758404  | -5,347896015 | 7,23614E-06 | 0,000191713 | 3,326914438 |
| SH2D2A    | -2,05805285  | 1,111384461  | -5,343836294 | 7,32216E-06 | 0,000193694 | 3,315240989 |
| GRIP2     | -1,58409711  | -0,582440005 | -5,342563621 | 7,34933E-06 | 0,000194115 | 3,311581585 |
| S1PR4     | -1,930574906 | -0,441686429 | -5,317010822 | 7,91683E-06 | 0,000208077 | 3,238116523 |
| TLR10     | -2,298322608 | -0,646954741 | -5,316601347 | 7,92628E-06 | 0,000208077 | 3,23693941  |
| HLA-DPA1  | -4,666562626 | 4,767777621  | -5,313457015 | 7,99916E-06 | 0,00020967  | 3,22790058  |
| GPR82     | -1,643846314 | -1,224003092 | -5,298598006 | 8,35273E-06 | 0,000218605 | 3,185189971 |
| TNFRSF8   | -1,74094977  | -0,570178456 | -5,295998419 | 8,41618E-06 | 0,000219598 | 3,177718389 |
| LAYN      | -2,634294048 | 0,982845892  | -5,294589813 | 8,45076E-06 | 0,000220167 | 3,173669937 |
| RFTN2     | -2,040043383 | -0,558405021 | -5,291600887 | 8,5246E-06  | 0,000221551 | 3,165079711 |
| GEM       | -2,645971347 | 2,299048841  | -5,291400074 | 8,52958E-06 | 0,000221551 | 3,164502581 |
| NR5A2     | -3,34795845  | 0,708204567  | -5,283244288 | 8,7345E-06  | 0,000226191 | 3,141064119 |
| PCDHB15   | -1,522633024 | -0,453367441 | -5,277532399 | 8,88093E-06 | 0,000229637 | 3,124650249 |
| ABCB1     | -2,857318228 | 0,21315037   | -5,276038425 | 8,91964E-06 | 0,000230292 | 3,120357287 |
| XYLT1     | -2,284606603 | -0,049437442 | -5,255335768 | 9,47364E-06 | 0,000243865 | 3,060875204 |
| INHBA     | -2,877841664 | -0,086119679 | -5,254127236 | 9,50703E-06 | 0,000244359 | 3,057403333 |
| BTLA      | -1,827987022 | -0,960130679 | -5,240048948 | 9,90467E-06 | 0,0002542   | 3,01696295  |
| WIPF1     | -3,190296464 | 3,269686619  | -5,239468925 | 9,92141E-06 | 0,000254251 | 3,015296962 |
| CD163L1   | -1,950453571 | -0,216228197 | -5,2343093   | 1,00715E-05 | 0,000257714 | 3,000477613 |
| MMP25     | -2,400939937 | 0,085731166  | -5,223494071 | 1,03936E-05 | 0,00026556  | 2,969417517 |
| BCL11B    | -2,151931224 | -0,328458753 | -5,222870562 | 1,04125E-05 | 0,000265649 | 2,967627004 |
| CYP7B1    | -1,713148874 | -0,970859066 | -5,215424362 | 1,06406E-05 | 0,000271067 | 2,946245085 |
| PTGIS     | -2,468347684 | -0,152158936 | -5,210391731 | 1,07975E-05 | 0,000274359 | 2,93179498  |
| LINC00341 | -1,602186485 | -0,721635217 | -5,210260902 | 1,08017E-05 | 0,000274359 | 2,931419347 |
| RGS4      | -3,592648981 | 0,873113611  | -5,209749977 | 1,08177E-05 | 0,000274362 | 2,929952394 |
| P2RX7     | -1,919052643 | -0,402281904 | -5,201431571 | 1,10828E-05 | 0,000280672 | 2,906070284 |
| LRCH2     | -2,07793173  | -0,794438095 | -5,200894728 | 1,11001E-05 | 0,000280698 | 2,904529102 |
| PLCB2     | -2,866549094 | 2,014438729  | -5,196592572 | 1,124E-05   | 0,000283402 | 2,892178803 |
| GPR97     | -2,485820675 | 0,079974973  | -5,177620471 | 1,18779E-05 | 0,000298613 | 2,837724216 |
| ZNF300P1  | -1,978466743 | -1,071296913 | -5,16686427  | 1,22555E-05 | 0,000307657 | 2,806858055 |
| HLA-DQA2  | -3,28389515  | 0,352527623  | -5,164538919 | 1,23387E-05 | 0,000309294 | 2,800185854 |
| COL8A1    | -3,207312044 | 0,334308322  | -5,154145891 | 1,27175E-05 | 0,000318071 | 2,770367769 |
| TMEM140   | -2,182215512 | 1,911338332  | -5,153587019 | 1,27382E-05 | 0,000318071 | 2,768764478 |
| FHL1      | -3,407331436 | 1,715490397  | -5,153423501 | 1,27443E-05 | 0,000318071 | 2,76829538  |
| APOBEC3H  | -1,671617485 | -0,402381025 | -5,146693481 | 1,29963E-05 | 0,000323891 | 2,74898947  |
| P2RY8     | -2,282921381 | -0,438459665 | -5,139740035 | 1,32618E-05 | 0,000330032 | 2,729044838 |
| ANO4      | -1,978964149 | -0,79842307  | -5,124901514 | 1,38468E-05 | 0,000343999 | 2,686491046 |
| LOC654433 | -2,469267943 | -0,032367395 | -5,124498646 | 1,3863E-05  | 0,000343999 | 2,685335852 |
| LRRN3     | -2,26559769  | -0,670304627 | -5,122584755 | 1,39404E-05 | 0,000345016 | 2,679848025 |
| CD1D      | -2,435382237 | 0,182444604  | -5,122494557 | 1,39441E-05 | 0,000345016 | 2,679589399 |
| TM6SF1    | -2,101080494 | -0,273175235 | -5,108197079 | 1,45362E-05 | 0,00035915  | 2,638599104 |
| TIMP3     | -3,878852977 | 3,262987597  | -5,106388797 | 1,46128E-05 | 0,000360527 | 2,633415567 |

|           |              |              |              |             |             |             |
|-----------|--------------|--------------|--------------|-------------|-------------|-------------|
| KLRC2     | -1,962107018 | -1,058191498 | -5,102395595 | 1,47835E-05 | 0,000364216 | 2,621969433 |
| DACT3     | -2,221273791 | 0,388044496  | -5,098259826 | 1,49624E-05 | 0,000368097 | 2,610115508 |
| PLXNC1    | -2,982329479 | 2,188812184  | -5,094653617 | 1,51202E-05 | 0,0003711   | 2,599780134 |
| ENPEP     | -2,832813143 | 0,297637437  | -5,094484615 | 1,51276E-05 | 0,0003711   | 2,599295793 |
| SLC6A1    | -1,567691139 | -1,186416089 | -5,088377242 | 1,53987E-05 | 0,000376963 | 2,581793715 |
| PPP2R2B   | -1,895551732 | -0,552166865 | -5,088115818 | 1,54104E-05 | 0,000376963 | 2,581044588 |
| TMEM200A  | -3,177394271 | 1,348025285  | -5,07984723  | 1,57854E-05 | 0,000385589 | 2,55735234  |
| TSHZ3     | -3,113286215 | 0,83481144   | -5,07597651  | 1,5964E-05  | 0,000389401 | 2,546262717 |
| LOC643733 | -2,246934713 | -0,586422984 | -5,072546833 | 1,6124E-05  | 0,000392747 | 2,536437367 |
| TRAT1     | -1,973349006 | -1,053226687 | -5,066490659 | 1,64105E-05 | 0,000398596 | 2,519089211 |
| HEYL      | -2,405469533 | 1,655125764  | -5,064778771 | 1,64924E-05 | 0,000400021 | 2,514185809 |
| STARD8    | -2,414719947 | 0,717576331  | -5,063699954 | 1,65442E-05 | 0,000400713 | 2,511095813 |
| HLA-F     | -3,852794289 | 2,823926958  | -5,060025292 | 1,67219E-05 | 0,000403957 | 2,50057117  |
| POU2AF1   | -2,782751448 | 0,208904168  | -5,059960262 | 1,6725E-05  | 0,000403957 | 2,500384924 |
| RGCC      | -2,722411611 | 2,933005568  | -5,050209612 | 1,72059E-05 | 0,00041499  | 2,472461742 |
| TBC1D10C  | -2,177611753 | 1,686275252  | -5,046611246 | 1,73868E-05 | 0,000418767 | 2,462158396 |
| RNASE1    | -3,329002028 | 4,437918743  | -5,043768923 | 1,7531E-05  | 0,000421651 | 2,454020393 |
| ZNF208    | -1,772632253 | -0,929427926 | -5,042891098 | 1,75758E-05 | 0,000422139 | 2,451507144 |
| PLXDC2    | -3,019042867 | 2,453569552  | -5,040350449 | 1,77061E-05 | 0,000424675 | 2,444233411 |
| IGSF21    | -1,508810549 | -1,353343058 | -5,036813663 | 1,78891E-05 | 0,000428467 | 2,434108434 |
| GPR176    | -1,942171143 | 0,798794974  | -5,023737718 | 1,8582E-05  | 0,000444445 | 2,396681633 |
| SCARF1    | -1,996082784 | 1,479734405  | -5,022690128 | 1,86387E-05 | 0,000445182 | 2,393683603 |
| ADAMTSL1  | -3,00772007  | 0,696202515  | -5,002136594 | 1,97858E-05 | 0,000471926 | 2,334876595 |
| MFAP4     | -4,373374975 | 1,711552449  | -5,000402944 | 1,98857E-05 | 0,000473653 | 2,329917559 |
| PRKCDBP   | -3,508239314 | 1,025643176  | -4,985086735 | 2,07905E-05 | 0,000494521 | 2,286114628 |
| HGF       | -1,871353848 | -0,81751642  | -4,983304018 | 2,08984E-05 | 0,000496402 | 2,281017223 |
| HVCN1     | -1,993480171 | 0,730091699  | -4,979915135 | 2,11052E-05 | 0,000500623 | 2,271327814 |
| TTN       | -1,524314481 | -0,954408403 | -4,978486033 | 2,1193E-05  | 0,000502014 | 2,267241992 |
| RASSF2    | -2,969671731 | 2,253316546  | -4,97633748  | 2,13256E-05 | 0,000504462 | 2,261099505 |
| ARHGAP6   | -1,915917244 | -0,472771727 | -4,973628513 | 2,14941E-05 | 0,00050775  | 2,253355299 |
| EDIL3     | -2,614017004 | -0,588580707 | -4,971589371 | 2,16218E-05 | 0,000510066 | 2,247526269 |
| HSD11B1   | -2,260494037 | -0,631345672 | -4,965189216 | 2,20274E-05 | 0,000518925 | 2,229232812 |
| CD72      | -2,062022261 | 1,09456352   | -4,963063949 | 2,21638E-05 | 0,000521425 | 2,223158817 |
| NPTX2     | -2,703961205 | 0,157219114  | -4,961883753 | 2,22399E-05 | 0,000522501 | 2,21978596  |
| MYLK      | -3,135433569 | 4,273389348  | -4,95539346  | 2,2663E-05  | 0,000531019 | 2,201239224 |
| DPEP2     | -1,802492699 | -0,66737133  | -4,955376704 | 2,26641E-05 | 0,000531019 | 2,201191348 |
| THEMIS    | -2,454100452 | -0,532815842 | -4,953812149 | 2,27673E-05 | 0,000532712 | 2,196720897 |
| GPR18     | -1,599328524 | -1,193049317 | -4,953233374 | 2,28056E-05 | 0,000532884 | 2,195067189 |
| HOXD11    | -2,029178134 | -0,429129014 | -4,943997953 | 2,34254E-05 | 0,000546625 | 2,168682441 |
| PLN       | -3,010357004 | -0,55640057  | -4,93991446  | 2,37048E-05 | 0,000552396 | 2,157018213 |
| DOCK8     | -3,062628155 | 2,239276535  | -4,927808203 | 2,45527E-05 | 0,000571381 | 2,12244457  |
| CDH11     | -3,549792493 | 2,905347885  | -4,92243833  | 2,49384E-05 | 0,000579573 | 2,107112462 |
| TSPAN18   | -2,618227837 | 0,287311717  | -4,921291518 | 2,50215E-05 | 0,000580722 | 2,103838349 |
| ESAM      | -3,295713004 | 2,16143534   | -4,912802953 | 2,56456E-05 | 0,000593606 | 2,079606824 |
| SIGLEC8   | -1,718936135 | -1,248280265 | -4,911984523 | 2,57066E-05 | 0,000594219 | 2,077270813 |
| IKZF3     | -2,862423747 | 1,923978111  | -4,911449673 | 2,57465E-05 | 0,000594344 | 2,075744242 |
| SEPT4     | -2,231424085 | 0,974758563  | -4,909857037 | 2,58658E-05 | 0,000596298 | 2,071198655 |
| CHRD      | -2,973284857 | 1,32269889   | -4,905579888 | 2,61888E-05 | 0,000602938 | 2,058992085 |
| GBP4      | -3,04467972  | 3,175140749  | -4,901154177 | 2,65273E-05 | 0,000609916 | 2,046363004 |
| FCGR3B    | -2,836213797 | -0,483763405 | -4,887668424 | 2,75858E-05 | 0,000633406 | 2,0078898   |
| KNDC1     | -1,617956701 | -1,030664091 | -4,855332186 | 3,0298E-05  | 0,000693831 | 1,915697483 |
| C16orf45  | -2,480492464 | 1,10532049   | -4,854428849 | 3,03774E-05 | 0,000694727 | 1,913123249 |
| COL1A2    | -4,600019983 | 6,448511458  | -4,853892912 | 3,04247E-05 | 0,000694885 | 1,911596025 |

|                  |              |              |              |             |             |             |
|------------------|--------------|--------------|--------------|-------------|-------------|-------------|
| N4BP2L1          | -2,069545798 | 2,216844295  | -4,844593032 | 3,12561E-05 | 0,000711986 | 1,885098597 |
| MARCO            | -2,375492516 | -0,59403079  | -4,841217796 | 3,15634E-05 | 0,000718036 | 1,875483602 |
| MMRN2            | -3,128836008 | 1,793561758  | -4,838018979 | 3,18574E-05 | 0,000723769 | 1,866372065 |
| HLX              | -2,040194141 | 0,838470468  | -4,834932172 | 3,21437E-05 | 0,000729311 | 1,857580409 |
| HLA-DPB1         | -4,270523457 | 4,384657937  | -4,823389593 | 3,32371E-05 | 0,000751151 | 1,824712815 |
| DLGAP1-<br>AS1   | -1,599763929 | 2,533535371  | -4,820168235 | 3,35488E-05 | 0,000757201 | 1,815542042 |
| SYDE1            | -1,989358577 | 1,70820707   | -4,819492223 | 3,36146E-05 | 0,000757693 | 1,813617643 |
| CARD16           | -3,106884569 | 2,043098297  | -4,817779735 | 3,37818E-05 | 0,000759596 | 1,808742893 |
| LAT              | -2,080420827 | 2,065541305  | -4,817724114 | 3,37873E-05 | 0,000759596 | 1,808584568 |
| FHL5             | -1,790823321 | -1,036528181 | -4,816746024 | 3,38832E-05 | 0,000760759 | 1,80580047  |
| TMEM215          | -2,116481437 | -0,690284171 | -4,813807063 | 3,41729E-05 | 0,000766265 | 1,797435329 |
| IGF2             | -4,400266538 | 2,778027305  | -4,809148092 | 3,46373E-05 | 0,000775668 | 1,784176109 |
| FCER1A           | -2,232868196 | -0,991314235 | -4,797646347 | 3,58107E-05 | 0,000799865 | 1,751451011 |
| COL6A1           | -3,400222067 | 5,391756927  | -4,795368747 | 3,60477E-05 | 0,000804116 | 1,744972138 |
| RRN3P2           | -1,958460888 | -0,317286728 | -4,772685341 | 3,84948E-05 | 0,000853998 | 1,680472948 |
| LOC728392        | -2,478350829 | 0,866430563  | -4,769506112 | 3,88507E-05 | 0,00085996  | 1,671436809 |
| TDO2             | -2,239250947 | -0,154492557 | -4,76482416  | 3,93808E-05 | 0,000870574 | 1,658131319 |
| P2RY6            | -1,799813855 | 0,365832092  | -4,762212129 | 3,96797E-05 | 0,000876056 | 1,65070918  |
| APOL3            | -2,238252188 | 2,403583325  | -4,744660443 | 4,1747E-05  | 0,000919342 | 1,600852825 |
| C2               | -2,622048953 | 2,538799281  | -4,740776319 | 4,22188E-05 | 0,000927359 | 1,589823869 |
| COL22A1          | -2,104571654 | -0,485367316 | -4,740330775 | 4,22732E-05 | 0,000927373 | 1,588558843 |
| ZDBF2            | -2,056034241 | -0,30475689  | -4,738611925 | 4,2484E-05  | 0,00093081  | 1,583678727 |
| SIGLEC12         | -1,541445962 | -1,337025352 | -4,73782434  | 4,25809E-05 | 0,000931747 | 1,581442733 |
| TNXB             | -2,75898431  | 0,897370625  | -4,733771547 | 4,3083E-05  | 0,000940345 | 1,569937623 |
| TM4SF18          | -2,416553482 | 0,840983893  | -4,732449395 | 4,32481E-05 | 0,000942753 | 1,56618464  |
| SFMBT2           | -2,719184985 | 0,842325109  | -4,727211621 | 4,39082E-05 | 0,000955933 | 1,551318729 |
| FAM26F           | -2,793698286 | 1,438901185  | -4,719371853 | 4,4915E-05  | 0,000976618 | 1,529072989 |
| ARHGAP30         | -2,247487947 | 2,17028466   | -4,707165837 | 4,65283E-05 | 0,001010421 | 1,494450312 |
| FOXS1            | -2,734791509 | 0,047942583  | -4,688308694 | 4,91344E-05 | 0,001064332 | 1,440992055 |
| FBXL7            | -3,47080377  | 1,07268821   | -4,686473032 | 4,93957E-05 | 0,001067585 | 1,43579013  |
| ZNF781           | -1,629653328 | -0,291715946 | -4,686013705 | 4,94613E-05 | 0,001067585 | 1,434488541 |
| DKK2             | -1,963903038 | -0,831245477 | -4,685948717 | 4,94706E-05 | 0,001067585 | 1,434304387 |
| CCL13            | -2,386015326 | -0,91474067  | -4,684601176 | 4,96636E-05 | 0,001070408 | 1,430486011 |
| APOBEC3G         | -3,041721188 | 2,438818346  | -4,683705219 | 4,97923E-05 | 0,001071841 | 1,427947348 |
| PEG3             | -2,293032611 | -0,574133076 | -4,682685612 | 4,99392E-05 | 0,001073661 | 1,42505843  |
| APOD             | -3,173336319 | 0,670704913  | -4,681936778 | 5,00473E-05 | 0,001074645 | 1,42293678  |
| JAM2             | -3,295521412 | 0,546613824  | -4,67821223  | 5,05887E-05 | 0,001084917 | 1,412385031 |
| CMAHP            | -2,906664878 | 1,137625595  | -4,671850768 | 5,15269E-05 | 0,001103663 | 1,394366295 |
| RLTPR            | -1,756075655 | 0,313633801  | -4,670905512 | 5,16678E-05 | 0,001105305 | 1,391689248 |
| LHFP             | -1,786047657 | 3,117985518  | -4,667953949 | 5,21101E-05 | 0,001113384 | 1,383330799 |
| LOC100505<br>495 | -2,854791519 | 1,041559119  | -4,654102529 | 5,42365E-05 | 0,001156082 | 1,344118145 |
| ARHGAP4          | -2,129832597 | 2,899135346  | -4,654062486 | 5,42428E-05 | 0,001156082 | 1,344004817 |
| ST8SIA4          | -3,575221366 | 1,642552118  | -4,65335435  | 5,43538E-05 | 0,001157016 | 1,342000697 |
| DPP6             | -2,24282543  | -0,847098042 | -4,646378963 | 5,54593E-05 | 0,001176188 | 1,322262403 |
| MME              | -3,959648801 | 1,606353676  | -4,645157681 | 5,56551E-05 | 0,00117889  | 1,318807099 |
| SNORA25          | -1,560036721 | -0,772334739 | -4,635641863 | 5,72047E-05 | 0,001210224 | 1,291890309 |
| CD1A             | -2,179867358 | -1,017814654 | -4,634381542 | 5,74131E-05 | 0,001213143 | 1,288326092 |
| RERG             | -2,759772749 | 0,141875322  | -4,606077254 | 6,2297E-05  | 0,001313118 | 1,208329409 |
| FILIP1L          | -2,828528548 | 2,755947262  | -4,603568839 | 6,27492E-05 | 0,001319143 | 1,20124439  |
| GPSM3            | -1,936510041 | 2,972894612  | -4,603218021 | 6,28127E-05 | 0,001319143 | 1,200253563 |
| ST6GALNA<br>C3   | -2,463890471 | 0,37624769   | -4,595941323 | 6,41442E-05 | 0,001345466 | 1,179705087 |
| RECK             | -2,270153504 | 0,705007587  | -4,593595775 | 6,45794E-05 | 0,001351965 | 1,173082908 |

|              |              |              |              |             |             |             |
|--------------|--------------|--------------|--------------|-------------|-------------|-------------|
| ROBO3        | -1,975271972 | -0,237556896 | -4,59295481  | 6,46988E-05 | 0,001352157 | 1,17127339  |
| FAM65B       | -2,365665092 | 0,783374137  | -4,591956888 | 6,48851E-05 | 0,001354408 | 1,168456239 |
| FGF7         | -2,541793095 | 0,180728248  | -4,589320376 | 6,538E-05   | 0,001361557 | 1,161013901 |
| GALNT15      | -1,838093981 | -0,54956885  | -4,58873521  | 6,54904E-05 | 0,001362089 | 1,15936221  |
| ZMIZ1-AS1    | -1,528018448 | -0,181599458 | -4,587003263 | 6,58181E-05 | 0,001367253 | 1,154473855 |
| CFP          | -1,755281293 | 0,042607385  | -4,585103145 | 6,61794E-05 | 0,001373104 | 1,149111265 |
| PCOLCE       | -3,392903281 | 3,471168162  | -4,570540586 | 6,9015E-05  | 0,001428494 | 1,108026912 |
| NAPSB        | -3,37817065  | 1,701367214  | -4,569941746 | 6,91341E-05 | 0,001429242 | 1,106338007 |
| CXCR2P1      | -1,814689503 | -1,177589494 | -4,562263472 | 7,06799E-05 | 0,001459447 | 1,084686964 |
| PRAM1        | -1,745875459 | -0,479657931 | -4,56111207  | 7,09147E-05 | 0,001462541 | 1,081440899 |
| PDLIM3       | -3,130633651 | 0,620306361  | -4,558889606 | 7,13699E-05 | 0,001468413 | 1,075175736 |
| CLEC12A      | -1,875771153 | -1,169862756 | -4,55403372  | 7,23747E-05 | 0,001485537 | 1,061489086 |
| GNG7         | -2,033552914 | -0,506848437 | -4,543284055 | 7,46492E-05 | 0,001530398 | 1,03120106  |
| TNFRSF17     | -1,936428667 | -1,118178744 | -4,538393905 | 7,57071E-05 | 0,001550241 | 1,017427574 |
| TMEM26       | -2,753848422 | 0,415861286  | -4,53688861  | 7,60358E-05 | 0,001555121 | 1,013188413 |
| ZNF626       | -2,742377279 | -0,203124519 | -4,512276967 | 8,16135E-05 | 0,001661307 | 0,943919924 |
| HECW2        | -2,032979693 | 0,324232609  | -4,499044372 | 8,47777E-05 | 0,00172368  | 0,906710514 |
| KCTD12       | -2,90390339  | 3,216548451  | -4,497924274 | 8,5051E-05  | 0,001727198 | 0,903561936 |
| PTPRN2       | -2,239946227 | 0,27857257   | -4,497496252 | 8,51557E-05 | 0,001727287 | 0,902358816 |
| C3orf70      | -1,854623171 | -0,690512267 | -4,493878349 | 8,60457E-05 | 0,001743285 | 0,892190317 |
| VGLL3        | -2,579914722 | -0,004156585 | -4,491750124 | 8,65735E-05 | 0,001751917 | 0,886209546 |
| CACNA1H      | -2,893605192 | 0,500545794  | -4,490948525 | 8,67731E-05 | 0,001753896 | 0,883957041 |
| LINC00667    | -2,952018045 | 0,648960817  | -4,487681269 | 8,75914E-05 | 0,001768361 | 0,874776911 |
| EPB41L3      | -3,286960918 | 1,318522524  | -4,478906299 | 8,98273E-05 | 0,001811377 | 0,850128811 |
| HLA-DQB2     | -2,513379794 | 0,285882868  | -4,477551629 | 9,01775E-05 | 0,001814221 | 0,84632461  |
| CCL14        | -2,276374313 | -0,769962038 | -4,477545477 | 9,01791E-05 | 0,001814221 | 0,846307336 |
| NPL          | -2,292208117 | 1,84107045   | -4,459192301 | 9,50582E-05 | 0,001903485 | 0,794793005 |
| DPYSL4       | -2,129120774 | -0,466641235 | -4,457627824 | 9,5486E-05  | 0,001909729 | 0,790403968 |
| IL33         | -3,513346158 | 2,328377155  | -4,457241851 | 9,55918E-05 | 0,001909729 | 0,789321201 |
| TMEM200B     | -2,466015987 | 0,685210771  | -4,447592389 | 9,82755E-05 | 0,001961069 | 0,762258509 |
| LOC100216479 | -2,287762929 | 0,25403204   | -4,43788256  | 0,000101051 | 0,002011795 | 0,735039997 |
| GFI1         | -1,881921909 | 0,199785374  | -4,436080283 | 0,000101575 | 0,002019885 | 0,729989371 |
| MYL9         | -2,890715769 | 4,96214008   | -4,433527919 | 0,000102321 | 0,002027698 | 0,722837536 |
| CLEC3B       | -2,124120567 | -0,222296614 | -4,428372952 | 0,000103845 | 0,002055526 | 0,708395995 |
| NTNG2        | -1,5145988   | -0,905969393 | -4,427517826 | 0,000104099 | 0,002058206 | 0,706000753 |
| VASH1        | -2,26267808  | 2,803159978  | -4,420589    | 0,000106188 | 0,002094683 | 0,686596796 |
| LPPR4        | -2,381833773 | 0,442777196  | -4,419363648 | 0,000106561 | 0,002099648 | 0,683165972 |
| RASA3        | -2,590667337 | 1,746500586  | -4,413577116 | 0,000108343 | 0,002132316 | 0,666967459 |
| COL10A1      | -2,348230451 | -0,815002805 | -4,412991945 | 0,000108525 | 0,002133456 | 0,665329642 |
| CST7         | -2,962388592 | 0,677600589  | -4,410657761 | 0,000109253 | 0,002142913 | 0,658797064 |
| ST8SIA1      | -1,710432526 | -0,45166598  | -4,410652328 | 0,000109255 | 0,002142913 | 0,65878186  |
| SOGA3        | -1,818308358 | -0,859192211 | -4,401114129 | 0,000112281 | 0,002197266 | 0,632096219 |
| TBX2         | -3,248230506 | 1,262767739  | -4,395560384 | 0,000114081 | 0,002223576 | 0,616564462 |
| PAG1         | -2,023233033 | 2,388538691  | -4,395374095 | 0,000114142 | 0,002223576 | 0,616043562 |
| NPR2         | -1,628658183 | 2,325593572  | -4,393915741 | 0,00011462  | 0,002229293 | 0,611965908 |
| GPR133       | -1,522858921 | -1,237592542 | -4,393688029 | 0,000114694 | 0,002229293 | 0,611329239 |
| LRRK2        | -2,355626209 | 0,245469405  | -4,384569534 | 0,000117728 | 0,002285674 | 0,585840994 |
| EMB          | -3,346281825 | 1,438979488  | -4,379912955 | 0,000119307 | 0,002313731 | 0,572829733 |
| CCL11        | -2,097900729 | -1,058797968 | -4,375189    | 0,000120931 | 0,002337892 | 0,559633632 |
| REN          | -2,508075058 | 0,787520231  | -4,37510394  | 0,000120961 | 0,002337892 | 0,559396054 |
| VSTM4        | -2,54361986  | 0,412000747  | -4,368421697 | 0,000123295 | 0,002380344 | 0,540735603 |
| CAMK1G       | -1,624636778 | -0,511667428 | -4,363555839 | 0,000125023 | 0,002408304 | 0,527151875 |
| AFF3         | -3,096466274 | 1,098826927  | -4,345793624 | 0,000131536 | 0,002521159 | 0,477597894 |

|          |              |              |              |             |             |              |
|----------|--------------|--------------|--------------|-------------|-------------|--------------|
| GPRASP1  | -1,814479229 | 1,418008111  | -4,345586314 | 0,000131614 | 0,002521159 | 0,477019827  |
| F10      | -1,822025334 | -0,710019858 | -4,335134955 | 0,000135603 | 0,002591816 | 0,447885974  |
| PTPRB    | -2,42740156  | 2,656515094  | -4,328647978 | 0,000138139 | 0,00263736  | 0,429811987  |
| CD1E     | -1,569103509 | -1,287386241 | -4,319958381 | 0,00014161  | 0,002700623 | 0,40561183   |
| TBXAS1   | -2,007161113 | 1,657263143  | -4,288344152 | 0,000154976 | 0,002948996 | 0,317673223  |
| CD5      | -2,636396928 | 0,477336533  | -4,286641819 | 0,00015573  | 0,002960072 | 0,31294276   |
| PROCR    | -2,106961835 | 1,951558214  | -4,282452159 | 0,000157601 | 0,002992333 | 0,301302584  |
| CEACAM21 | -2,58876643  | -0,175778143 | -4,277890684 | 0,000159663 | 0,00302815  | 0,288632804  |
| TSPAN2   | -2,65609435  | -0,010515493 | -4,277385992 | 0,000159893 | 0,003029144 | 0,287231211  |
| MCAM     | -2,03625802  | 4,469544064  | -4,274730135 | 0,000161108 | 0,003042144 | 0,279856279  |
| POSTN    | -3,914892393 | 1,973199203  | -4,261719644 | 0,00016719  | 0,003150095 | 0,243745643  |
| TNFSF14  | -2,287610188 | 0,439889682  | -4,259073726 | 0,000168455 | 0,00317045  | 0,236405498  |
| FFAR2    | -2,155579773 | -0,840391818 | -4,255191944 | 0,000170327 | 0,003202184 | 0,225639111  |
| FOXN4    | -2,615989681 | 0,247609676  | -4,253734782 | 0,000171035 | 0,003208489 | 0,221598255  |
| KCNE4    | -2,495631901 | 0,413014973  | -4,246447828 | 0,000174619 | 0,003265059 | 0,201396422  |
| C3orf80  | -1,640742232 | -1,116095216 | -4,238524758 | 0,0001786   | 0,003332262 | 0,179441746  |
| CLEC4E   | -2,658941913 | 0,267275412  | -4,237882061 | 0,000178927 | 0,003334747 | 0,177661335  |
| PMP22    | -1,985690771 | 3,374107886  | -4,22285624  | 0,000186738 | 0,003469059 | 0,136057669  |
| RGS2     | -2,760662388 | 3,021634503  | -4,214202824 | 0,000191388 | 0,003547778 | 0,112116532  |
| GAS1     | -2,707459125 | 0,875237597  | -4,202531037 | 0,00019784  | 0,003651657 | 0,079846275  |
| GBP2     | -2,686704994 | 4,167089768  | -4,190325881 | 0,000204815 | 0,003770802 | 0,046128306  |
| FAM19A5  | -2,766291991 | 0,469262161  | -4,19009129  | 0,000204952 | 0,003770802 | 0,045480496  |
| GBGT1    | -1,993942978 | 0,383273707  | -4,187011429 | 0,000206751 | 0,003791752 | 0,036976596  |
| HNRNPUL2 |              |              |              |             |             |              |
| -BSCL2   | 3,455681     | 4,259850025  | 4,182016559  | 0,000209702 | 0,0038377   | 0,023188894  |
| LILRA3   | -1,757726623 | -1,228885022 | -4,179004253 | 0,000211502 | 0,003862426 | 0,014876081  |
| PDZD4    | -1,807106019 | -0,742003234 | -4,174671478 | 0,000214117 | 0,003906043 | 0,002922286  |
| PTGIR    | -1,70991317  | -0,601945906 | -4,168862896 | 0,000217673 | 0,003962517 | -0,013097549 |
| LGALS2   | -2,069485839 | -0,836771934 | -4,168123812 | 0,000218129 | 0,003962601 | -0,015135451 |
| NEXN     | -1,672992801 | 1,182163521  | -4,167661899 | 0,000218415 | 0,003963463 | -0,01640905  |
| PDE4B    | -2,704204713 | 2,024778484  | -4,164239017 | 0,000220545 | 0,003997896 | -0,025845419 |
| NID1     | -3,292257469 | 3,272673475  | -4,154788751 | 0,000226531 | 0,004097783 | -0,051886694 |
| ITGA1    | -2,515724915 | 3,422592564  | -4,153188358 | 0,00022756  | 0,004112086 | -0,05629505  |
| LAX1     | -1,800776471 | -0,484582347 | -4,148723426 | 0,000230457 | 0,004155703 | -0,068591286 |
| FCRLA    | -1,708488565 | -1,232148795 | -4,143119898 | 0,000234143 | 0,00421466  | -0,084017679 |
| GIMAP2   | -2,374728456 | 1,284072835  | -4,143010198 | 0,000234216 | 0,00421466  | -0,084319619 |
| FMNL1    | -1,606967968 | 2,740389623  | -4,139349761 | 0,000236656 | 0,004254121 | -0,094393328 |
| HHEX     | -1,877638131 | 0,644203706  | -4,13607787  | 0,000238858 | 0,00428476  | -0,103395515 |
| FLRT2    | -2,432057218 | 0,811319585  | -4,129281596 | 0,000243496 | 0,004363423 | -0,122087848 |
| CD180    | -1,928864517 | 0,640702851  | -4,122695119 | 0,000248076 | 0,004431656 | -0,140194426 |
| GJA4     | -3,22361641  | 1,244184789  | -4,112599531 | 0,00025526  | 0,004544057 | -0,167930942 |
| NAP1L3   | -1,824361909 | -0,193894741 | -4,112373194 | 0,000255423 | 0,004544057 | -0,168552542 |
| HEG1     | -1,812877287 | 3,696190634  | -4,099715138 | 0,000264726 | 0,004690169 | -0,203299584 |
| AOC3     | -1,881726375 | 1,708841854  | -4,091017209 | 0,00027131  | 0,004792027 | -0,227156986 |
| ZCCHC24  | -1,71456728  | 2,345493767  | -4,086669571 | 0,000274661 | 0,004846242 | -0,239076242 |
| BMP8A    | -2,187901699 | 0,913056229  | -4,081769607 | 0,000278486 | 0,004908707 | -0,252505055 |
| WT1      | -2,295683189 | 0,265862708  | -4,067711636 | 0,000289753 | 0,005096869 | -0,291004619 |
| POPDC2   | -1,539484804 | 0,436224726  | -4,066567392 | 0,000290689 | 0,005108124 | -0,294136462 |
| FAM49A   | -2,020185599 | 1,700394839  | -4,065981214 | 0,00029117  | 0,005111359 | -0,295740751 |
| GRAP     | -2,126445917 | 2,016497592  | -4,063272015 | 0,000293403 | 0,005140075 | -0,303154516 |
| COL4A1   | -2,087242423 | 7,049041527  | -4,046931747 | 0,00030723  | 0,005344248 | -0,347837054 |
| OLFML3   | -2,485078533 | 2,653599474  | -4,045865219 | 0,000308154 | 0,005354918 | -0,350751507 |
| ZNF334   | -2,179073756 | -0,576739841 | -4,040102635 | 0,000313196 | 0,005437043 | -0,366494461 |
| TRO      | -2,899886719 | 0,958708888  | -4,039528561 | 0,000313703 | 0,005440354 | -0,368062398 |

|              |              |              |              |             |             |              |
|--------------|--------------|--------------|--------------|-------------|-------------|--------------|
| RASL12       | -2,681347168 | 1,511172316  | -4,03699643  | 0,000315947 | 0,005468264 | -0,374977429 |
| NNMT         | -3,486199435 | 2,845152493  | -4,032168904 | 0,00032027  | 0,005537512 | -0,38815716  |
| ARMCX1       | -2,332653032 | 1,355994169  | -4,030442462 | 0,000321829 | 0,005558902 | -0,392869334 |
| PLA2G7       | -2,762675683 | 1,778128495  | -4,029049415 | 0,000323094 | 0,005575144 | -0,396671064 |
| RAB31        | -2,517417068 | 3,958557155  | -4,021713689 | 0,000329831 | 0,005680016 | -0,416683867 |
| KIAA0125     | -1,882725968 | -1,166385349 | -4,02014672  | 0,000331288 | 0,005699405 | -0,42095724  |
| MSRB3        | -2,455715971 | 1,767295056  | -4,017928016 | 0,000333361 | 0,005723642 | -0,427007082 |
| CDH5         | -2,596039199 | 3,088123949  | -4,015574196 | 0,000335575 | 0,005755913 | -0,433424175 |
| SIRPB2       | -1,700901607 | -0,622434034 | -4,012355165 | 0,000338626 | 0,005802462 | -0,442198076 |
| VAMP5        | -1,907163729 | 2,532773889  | -4,007942574 | 0,000342852 | 0,005857393 | -0,454221484 |
| SYNE1        | -2,198419525 | 2,621058356  | -4,003300144 | 0,000347354 | 0,005928425 | -0,466866516 |
| CXCR7        | -2,335492159 | 2,87210462   | -4,002554631 | 0,000348082 | 0,005934974 | -0,468896695 |
| USHBP1       | -2,030555268 | 0,361219416  | -3,986496121 | 0,000364138 | 0,006178156 | -0,512597175 |
| RSPO1        | -1,598994721 | -1,287825939 | -3,984239057 | 0,000366453 | 0,006211298 | -0,51873476  |
| ABCA6        | -1,688614791 | -0,507617416 | -3,978543198 | 0,000372356 | 0,006292786 | -0,534218275 |
| STON1        | -1,821816284 | 1,111284925  | -3,976563677 | 0,00037443  | 0,006321625 | -0,539597651 |
| CHIT1        | -1,824143886 | -0,734672269 | -3,975731004 | 0,000375305 | 0,006330201 | -0,541860187 |
| LOC339524    | -1,520473884 | -0,053391677 | -3,96473842  | 0,000387054 | 0,006509234 | -0,571714392 |
| CYSLTR1      | -1,620621382 | -0,819484754 | -3,961047958 | 0,000391078 | 0,006564092 | -0,581730941 |
| DNM3OS       | -2,633551994 | 0,201084331  | -3,958413774 | 0,000393976 | 0,006595208 | -0,588878655 |
| DPYD         | -2,38654711  | 1,283988288  | -3,95581459  | 0,000396855 | 0,006633893 | -0,595929834 |
| DYX1C1-CCPG1 | 2,903441206  | 1,317529521  | 3,955537926  | 0,000397163 | 0,006633893 | -0,596680289 |
| VEGFC        | -2,099543959 | 1,753607525  | -3,953156012 | 0,000399822 | 0,006665375 | -0,603140528 |
| KCNAB2       | -2,028442565 | 2,212127707  | -3,945790201 | 0,000408155 | 0,006758494 | -0,623109804 |
| TBC1D3       | -1,955381303 | -0,569044537 | -3,943306806 | 0,000411002 | 0,006792583 | -0,629839635 |
| CALHM2       | -2,09727379  | 1,247717295  | -3,938148944 | 0,000416979 | 0,006858444 | -0,643812493 |
| CX3CR1       | -1,614316274 | -0,277367025 | -3,936724946 | 0,000418644 | 0,006879258 | -0,647669066 |
| DOC2A        | -2,081105387 | -0,233713147 | -3,933436389 | 0,000422513 | 0,006936227 | -0,656573552 |
| MYOCD        | -1,539523719 | -1,157199854 | -3,913166785 | 0,000447148 | 0,00730126  | -0,711401534 |
| NDNF         | -2,348397926 | -0,0764548   | -3,906705495 | 0,000455292 | 0,007402775 | -0,728858347 |
| DPT          | -2,027388832 | -0,832161525 | -3,905312635 | 0,000457066 | 0,007418604 | -0,732620197 |
| ELFN1        | -1,657798962 | -0,690852722 | -3,904484574 | 0,000458124 | 0,007421788 | -0,734856413 |
| C22orf34     | -1,599525626 | -0,880119095 | -3,899448963 | 0,000464611 | 0,007519792 | -0,748451742 |
| CLDN5        | -2,583100383 | 0,897647512  | -3,895217882 | 0,00047013  | 0,007594844 | -0,759870231 |
| C1R          | -2,417632223 | 5,289043893  | -3,89023285  | 0,000476714 | 0,007694002 | -0,77331785  |
| LAMA2        | -2,283708396 | 1,110031985  | -3,884815639 | 0,000483972 | 0,007792033 | -0,787924449 |
| ECEL1P2      | -2,114604366 | -0,413945269 | -3,884687039 | 0,000484146 | 0,007792033 | -0,788271109 |
| SELL         | -2,321343149 | 1,348646431  | -3,883522783 | 0,00048572  | 0,007810072 | -0,791409356 |
| P2RX1        | -1,790272436 | -0,713200735 | -3,88129027  | 0,000488753 | 0,007840675 | -0,797426158 |
| RARB         | -1,834024979 | 1,927523195  | -3,878673058 | 0,000492332 | 0,007886934 | -0,804478198 |
| CLECL1       | -1,649626981 | -1,186894428 | -3,877900327 | 0,000493394 | 0,007892868 | -0,806559988 |
| PSD          | -1,958612861 | 1,32691065   | -3,877736393 | 0,000493619 | 0,007892868 | -0,807001619 |
| CHRD1        | -1,98691879  | -0,843833265 | -3,871891785 | 0,000501725 | 0,008007609 | -0,822742395 |
| P2RX5        | -1,547916866 | -0,775272885 | -3,868349072 | 0,000506702 | 0,008072072 | -0,832279567 |
| IGFBP7       | -2,537147019 | 7,04986851   | -3,867279961 | 0,000508213 | 0,008088664 | -0,835157059 |
| COL11A1      | -1,94257509  | -0,967281508 | -3,865765018 | 0,000510362 | 0,008107951 | -0,839234017 |
| LAMA4        | -2,740807896 | 3,802310013  | -3,865761854 | 0,000510366 | 0,008107951 | -0,83924253  |
| PODN         | -2,098889546 | 0,561119259  | -3,857524573 | 0,000522207 | 0,008273161 | -0,861400379 |
| LAIR2        | -1,504147745 | -1,002446993 | -3,855534742 | 0,000525107 | 0,008311462 | -0,866750378 |
| HLA-DQB1     | -3,511017455 | 4,848828708  | -3,847473941 | 0,000537018 | 0,008476607 | -0,888413053 |
| FRZB         | -2,619601494 | 2,373429655  | -3,841973483 | 0,000545296 | 0,008588928 | -0,903185638 |
| IL1B         | -2,841189005 | 0,824895531  | -3,83693385  | 0,000552989 | 0,008665174 | -0,91671386  |
| GZMM         | -1,607704687 | -0,688875438 | -3,831318181 | 0,000561687 | 0,008785475 | -0,931780768 |

|               |              |              |              |             |             |              |
|---------------|--------------|--------------|--------------|-------------|-------------|--------------|
| MAFB          | -1,538043092 | 3,424863011  | -3,814212435 | 0,00058901  | 0,009179496 | -0,977625913 |
| FMO2          | -1,685924068 | -0,718956463 | -3,81068041  | 0,000594811 | 0,009244803 | -0,9870827   |
| EBF1          | -2,178006696 | 1,133848704  | -3,81035391  | 0,00059535  | 0,009244837 | -0,98795672  |
| KANK3         | -1,635328547 | 0,121788613  | -3,808676117 | 0,000598128 | 0,009279599 | -0,992447636 |
| BATF3         | -1,648720243 | -0,159259161 | -3,805137259 | 0,000604027 | 0,009354277 | -1,001917626 |
| CD36          | -2,444667899 | 0,242060025  | -3,804517687 | 0,000605066 | 0,009356284 | -1,003575265 |
| CCDC80        | -2,275871991 | 4,053336594  | -3,800298442 | 0,000612186 | 0,009446649 | -1,014861021 |
| ADAM8         | -1,968539151 | 2,891876118  | -3,797339725 | 0,000617228 | 0,009515919 | -1,022772305 |
| NOS3          | -1,984152324 | 1,6934063    | -3,790507091 | 0,000629025 | 0,009671827 | -1,04103323  |
| HLA-DRB5      | -3,647378839 | 3,460548098  | -3,7900844   | 0,000629762 | 0,009674522 | -1,042162513 |
| TXLNB         | -1,549344832 | -0,847055704 | -3,788286478 | 0,000632907 | 0,009714159 | -1,046965404 |
| PEAR1         | -1,919770644 | 0,520964974  | -3,775580088 | 0,000655568 | 0,010008451 | -1,080884292 |
| ITGA4         | -2,708694666 | 2,351411349  | -3,771728721 | 0,000662591 | 0,010097771 | -1,09115678  |
| NFASC         | -2,72565018  | 0,805923285  | -3,769788216 | 0,000666157 | 0,010134185 | -1,096331054 |
| ADRA2C        | -2,563618383 | 1,646488136  | -3,766007167 | 0,00067316  | 0,010231678 | -1,106410164 |
| ADAMTS6       | -2,171689384 | 1,753110714  | -3,764928071 | 0,000675172 | 0,010244171 | -1,109285995 |
| SLC37A2       | -2,301604365 | 0,690994861  | -3,762378923 | 0,000679947 | 0,010307545 | -1,116078329 |
| MXRA8         | -2,772270677 | 3,067936602  | -3,744886993 | 0,000713613 | 0,010751643 | -1,162639045 |
| HOXD3         | -1,697573196 | -0,187417898 | -3,740633987 | 0,00072204  | 0,010868427 | -1,173947279 |
| CD3G          | -1,987173791 | -0,669837104 | -3,735638708 | 0,000732062 | 0,010991142 | -1,1872228   |
| RSPO3         | -2,155430439 | 0,28666378   | -3,735175231 | 0,000732999 | 0,010995619 | -1,188454195 |
| UQCRBP1       | -1,937233069 | 4,761194795  | -3,720569343 | 0,000763121 | 0,011378204 | -1,227229664 |
| LTBP2         | -2,449920762 | 3,990785368  | -3,715464692 | 0,000773929 | 0,01149186  | -1,240767449 |
| HLA-DRB1      | -3,648277965 | 5,65146687   | -3,712352168 | 0,000780593 | 0,011558545 | -1,249018445 |
| RBP5          | -1,836054264 | 0,460219099  | -3,688306442 | 0,000833982 | 0,012190187 | -1,312669442 |
| TBX3          | -2,97009693  | 2,315408815  | -3,685458207 | 0,000840536 | 0,012256447 | -1,320198096 |
| EFEMP1        | -3,482843439 | 2,247641108  | -3,68382648  | 0,000844313 | 0,012290712 | -1,324510146 |
| CRISPLD2      | -1,520040344 | 3,257419     | -3,678191245 | 0,000857485 | 0,012461391 | -1,339396131 |
| MEIS3         | -2,06440579  | 0,857959846  | -3,674435184 | 0,000866375 | 0,012571618 | -1,349313043 |
| PDE2A         | -1,779500049 | -0,274362883 | -3,67366769  | 0,000868203 | 0,012585283 | -1,351338916 |
| JPH4          | -1,711222183 | -0,957704161 | -3,671766528 | 0,000872746 | 0,012629877 | -1,356356479 |
| GLI1          | -1,966941811 | 0,168083613  | -3,665704185 | 0,000887387 | 0,012809467 | -1,372349293 |
| DLC1          | -2,37711789  | 2,996802894  | -3,664099987 | 0,000891301 | 0,012844433 | -1,376579479 |
| HIST1H4J      | -2,555259658 | 1,031935864  | -3,66348655  | 0,000892802 | 0,012850171 | -1,378196886 |
| SDPR          | -2,47398681  | 0,905024824  | -3,662453722 | 0,000895335 | 0,012859524 | -1,380919822 |
| HHIP          | -2,552919509 | 0,269964176  | -3,661053735 | 0,00089878  | 0,01289824  | -1,384610235 |
| JAKMIP1       | -1,695490423 | -0,684765766 | -3,647286247 | 0,000933346 | 0,01333871  | -1,420871369 |
| BTN3A1        | -1,718179016 | 4,767524383  | -3,644516577 | 0,000940454 | 0,013384752 | -1,428159483 |
| HHIP-AS1      | -1,839852301 | -0,054025199 | -3,64394681  | 0,000941922 | 0,013394585 | -1,42965849  |
| AGBL2         | -1,776373965 | 0,7051621    | -3,642736871 | 0,000945049 | 0,013427954 | -1,432841416 |
| MS4A2         | -1,586828074 | -1,291520208 | -3,640903866 | 0,000949804 | 0,013471017 | -1,437662585 |
| GLT8D2        | -2,06016604  | 1,353815095  | -3,640664713 | 0,000950426 | 0,013471017 | -1,438291532 |
| PILRA         | -1,954751244 | 1,697862901  | -3,63965577  | 0,000953055 | 0,013497171 | -1,440944761 |
| ZIK1          | -1,533761824 | -0,816284102 | -3,636733402 | 0,00096071  | 0,013594398 | -1,448628045 |
| DKFZp686D0853 | -2,616703046 | -0,758156066 | -3,635345395 | 0,000964366 | 0,013597931 | -1,452276411 |
| LRRC36        | -1,523372172 | -0,162571588 | -3,63175153  | 0,000973897 | 0,013668684 | -1,461720202 |
| NAIP          | -1,525872661 | 4,325891741  | -3,629504432 | 0,000979902 | 0,013730588 | -1,467623074 |
| INSR          | -2,320381771 | 3,85276552   | -3,625554568 | 0,000990545 | 0,013834692 | -1,477995279 |
| CCL3L3        | -1,767776937 | -1,12816919  | -3,616575245 | 0,001015158 | 0,014155498 | -1,501557324 |
| FPR2          | -1,648773467 | -1,189666008 | -3,610998496 | 0,001030742 | 0,014326397 | -1,516178724 |
| PLAT          | -2,615501621 | 3,666157357  | -3,604434103 | 0,001049382 | 0,014573721 | -1,533377561 |
| CXCL10        | -2,835018629 | 2,891803924  | -3,603915481 | 0,001050869 | 0,014582606 | -1,534735805 |
| F2R           | -1,796842465 | 3,601797186  | -3,598690215 | 0,00106596  | 0,014716564 | -1,548415954 |

|                |              |              |              |             |             |              |
|----------------|--------------|--------------|--------------|-------------|-------------|--------------|
| PTPRO          | -2,278646712 | -0,037978395 | -3,598503221 | 0,001066504 | 0,014716564 | -1,548905364 |
| HCG27          | -1,661829923 | -0,1012482   | -3,595290549 | 0,001075892 | 0,014822344 | -1,557312084 |
| KIF19          | -1,999582387 | 0,228075769  | -3,59404636  | 0,001079549 | 0,014860837 | -1,560566955 |
| MCOLN2         | -1,9327693   | 0,644771476  | -3,585948132 | 0,001103647 | 0,015132085 | -1,581740828 |
| MATK           | -1,924802873 | -0,475596329 | -3,582664009 | 0,001113567 | 0,015228925 | -1,590321866 |
| GPR75-<br>ASB3 | 2,03971275   | 0,889628482  | 3,579887693  | 0,001122021 | 0,015323011 | -1,597573472 |
| CCR7           | -1,863153246 | -0,159200764 | -3,572890186 | 0,001143604 | 0,01556838  | -1,615840087 |
| CXCL11         | -2,41161729  | 0,758669626  | -3,571779636 | 0,001147066 | 0,015603177 | -1,618737724 |
| ATP8A1         | -1,573397173 | 2,709951594  | -3,570366145 | 0,001151487 | 0,015638612 | -1,62242524  |
| TCF4           | -3,0637317   | 4,219685605  | -3,56833482  | 0,00115787  | 0,015700531 | -1,627723475 |
| PCDH18         | -2,828633813 | 2,36641591   | -3,563559337 | 0,00117301  | 0,015843451 | -1,640174149 |
| PRELP          | -2,344721206 | 1,166469369  | -3,560158847 | 0,001183907 | 0,015934505 | -1,649035598 |
| IRF8           | -2,92051014  | 1,569307419  | -3,558861738 | 0,001188089 | 0,015971967 | -1,652414826 |
| CXCR1          | -1,779924284 | -0,995653881 | -3,558026224 | 0,001190791 | 0,015995799 | -1,654591227 |
| MIR155HG       | -1,840055059 | 0,458803045  | -3,555458802 | 0,00119913  | 0,016095262 | -1,661277649 |
| GLIPR2         | -2,513732233 | 3,350364126  | -3,546350074 | 0,001229173 | 0,016396811 | -1,684983106 |
| FXD5           | -2,31955883  | 3,000909553  | -3,543361635 | 0,001239188 | 0,016517068 | -1,692754818 |
| TWIST2         | -1,643776659 | -0,43603071  | -3,543028724 | 0,001240308 | 0,016519217 | -1,69362041  |
| NBPF10         | 1,529304208  | 3,978378819  | 3,53473698   | 0,001268533 | 0,016804162 | -1,715168178 |
| PRR16          | -1,678391381 | 0,045452262  | -3,525705073 | 0,001299984 | 0,01708933  | -1,738614511 |
| MIAT           | -3,411844712 | 1,899023206  | -3,524613462 | 0,001303836 | 0,017113837 | -1,741446507 |
| NR3C1          | -2,526894603 | 2,076980461  | -3,523453561 | 0,001307941 | 0,017142205 | -1,744455252 |
| S1PR3          | -2,280369418 | 2,66331468   | -3,514841158 | 0,001338812 | 0,017479673 | -1,76678202  |
| P4HA3          | -1,550573636 | 0,309608035  | -3,509938765 | 0,001356699 | 0,017641377 | -1,779480293 |
| GAS6           | -1,864615934 | 2,912337333  | -3,50610473  | 0,001370847 | 0,017776628 | -1,789405865 |
| RMRP           | -1,653762001 | 0,45918908   | -3,505272051 | 0,001373939 | 0,017803313 | -1,791560879 |
| AKAP2          | -1,715532018 | 3,36790379   | -3,501794708 | 0,001386923 | 0,017931078 | -1,800557977 |
| C4A            | -2,462877524 | 3,993683683  | -3,499140317 | 0,001396913 | 0,018033167 | -1,807423166 |
| DTHD1          | -1,614656084 | -0,470135481 | -3,496311386 | 0,001407637 | 0,018112931 | -1,814737244 |
| PI15           | -2,113002589 | -0,101238719 | -3,494043609 | 0,001416291 | 0,018174334 | -1,820598597 |
| ANKRD36B<br>P2 | -1,547019104 | -0,926593611 | -3,492149379 | 0,001423559 | 0,018240414 | -1,825493179 |
| SOCS1          | -1,550160302 | 1,49125121   | -3,489134561 | 0,001435201 | 0,018321423 | -1,833280873 |
| LOC339803      | -2,101614502 | -0,193795601 | -3,486775398 | 0,001444375 | 0,018417036 | -1,83937284  |
| SOWAHB         | 1,657570381  | 1,756377201  | 3,48665883   | 0,00144483  | 0,018417036 | -1,8396738   |
| ST6GAL2        | -2,031729726 | 0,266177808  | -3,483411379 | 0,001457555 | 0,018542937 | -1,848056436 |
| VAT1L          | -1,588757875 | -1,213227368 | -3,48331416  | 0,001457937 | 0,018542937 | -1,848307334 |
| ITGB2-AS1      | -1,94789388  | 0,459820364  | -3,482532472 | 0,001461017 | 0,018568394 | -1,850324559 |
| GPR68          | -1,604717883 | 0,154621891  | -3,480279561 | 0,001469928 | 0,018648333 | -1,856137294 |
| RASD2          | -1,634268283 | -0,017187652 | -3,480121541 | 0,001470556 | 0,018648333 | -1,856544939 |
| SFRP1          | -3,509111253 | 2,499387248  | -3,477661491 | 0,00148035  | 0,018744935 | -1,862890073 |
| RPPH1          | -1,560828661 | -0,243896508 | -3,477262336 | 0,001481945 | 0,018751346 | -1,863919411 |
| GLIPR1         | -1,937555826 | 2,887663513  | -3,471302212 | 0,001505962 | 0,018916249 | -1,879283082 |
| DSC2           | 1,663089531  | 6,274510924  | 3,469642822  | 0,001512715 | 0,018987226 | -1,883558466 |
| ENTPD1         | -2,181192626 | 3,655440327  | -3,463957394 | 0,001536075 | 0,019211092 | -1,898199896 |
| C22orf15       | -1,848271609 | -0,604257329 | -3,454608996 | 0,001575243 | 0,019600626 | -1,922250921 |
| HLA-DRA        | -3,785108043 | 7,014979234  | -3,453074909 | 0,001581762 | 0,019667528 | -1,926194934 |
| ANO1           | -2,050924365 | 5,086539269  | -3,451042208 | 0,00159044  | 0,019761157 | -1,931419619 |
| ABI3BP         | -3,06357902  | 1,69090982   | -3,449376078 | 0,001597587 | 0,019821354 | -1,935701064 |
| EMP3           | -1,754660676 | 3,187141464  | -3,443324917 | 0,001623804 | 0,020059925 | -1,951242819 |
| GATA3          | -1,525278282 | -0,08832281  | -3,429806421 | 0,001683881 | 0,020639229 | -1,985918745 |
| SNAP25         | -1,728727522 | -0,345672124 | -3,422940965 | 0,001715205 | 0,020993284 | -2,003505265 |
| OLFM1          | -2,244684303 | 0,120032829  | -3,4183799   | 0,001736325 | 0,021176523 | -2,015179925 |



|              |              |              |              |             |             |              |
|--------------|--------------|--------------|--------------|-------------|-------------|--------------|
| HLA-DOA      | -2,5762224   | 2,01713872   | -3,41278141  | 0,00176259  | 0,021421008 | -2,029500223 |
| CD82         | 1,611893371  | 4,902969885  | 3,402849184  | 0,001810131 | 0,021859938 | -2,054879042 |
| DACT1        | -2,246880336 | 0,900376501  | -3,39826481  | 0,001832488 | 0,022026296 | -2,066581469 |
| LOC100507463 | -1,90256245  | 2,68264559   | -3,397393698 | 0,001836767 | 0,022036744 | -2,068804308 |
| SUSD3        | -1,76409106  | 0,584611981  | -3,388232605 | 0,001882344 | 0,022408941 | -2,092164843 |
| LGI4         | -1,582644649 | -0,793821315 | -3,388047362 | 0,001883276 | 0,022408941 | -2,092636902 |
| BNC2         | -2,120629869 | 0,817008718  | -3,386732541 | 0,001889909 | 0,022461098 | -2,09598716  |
| MDFIC        | -2,181519266 | 2,043394018  | -3,375586505 | 0,001947049 | 0,023013127 | -2,124363579 |
| CHST11       | -2,289538961 | 2,817464035  | -3,369867168 | 0,001977009 | 0,023306084 | -2,13890724  |
| PDE1A        | -1,603879139 | 1,186836821  | -3,368307651 | 0,001985255 | 0,023361224 | -2,142870908 |
| THBS4        | -2,26708131  | 2,0587246    | -3,360891212 | 0,002024925 | 0,023705796 | -2,161708676 |
| PATL2        | -1,555256961 | -0,149318595 | -3,359661344 | 0,002031576 | 0,023751372 | -2,164830644 |
| LRRC4B       | -1,809485264 | -0,727652914 | -3,353094472 | 0,002067448 | 0,024056438 | -2,1814912   |
| CD38         | -1,647752005 | 0,580512646  | -3,346986431 | 0,00210136  | 0,024396762 | -2,196973766 |
| HCLS1        | -2,499929906 | 3,552865569  | -3,34680714  | 0,002102363 | 0,024396762 | -2,197428028 |
| CBFA2T3      | -1,527602141 | -0,298500451 | -3,345884885 | 0,002107532 | 0,024440274 | -2,199764517 |
| LCP1         | -2,28918747  | 5,256768645  | -3,339729334 | 0,002142345 | 0,024770984 | -2,215351444 |
| CCL2         | -2,404181555 | 3,62392268   | -3,339700681 | 0,002142508 | 0,024770984 | -2,215423966 |
| SCG5         | -2,161500297 | 0,738584915  | -3,338545142 | 0,002149105 | 0,024805452 | -2,218348451 |
| MUSTN1       | -1,667394205 | 0,027214685  | -3,331573326 | 0,002189322 | 0,025168431 | -2,235982714 |
| TTYH2        | -1,632813747 | 0,650808505  | -3,330548884 | 0,002195292 | 0,025220226 | -2,238572409 |
| NLRP1        | -2,435369581 | 1,885944138  | -3,328880893 | 0,002205046 | 0,025315393 | -2,242788121 |
| CCDC17       | -1,518189296 | 1,304851884  | -3,32846445  | 0,002207487 | 0,02532654  | -2,243840489 |
| RBMS3        | -2,004680212 | 1,286124483  | -3,316080529 | 0,002281293 | 0,025914344 | -2,275106123 |
| PTPN22       | -2,201845587 | 0,674647274  | -3,314779012 | 0,002289186 | 0,025971034 | -2,278388789 |
| FAM92B       | -2,225898545 | 0,563157213  | -3,314512074 | 0,002290808 | 0,025971034 | -2,279061979 |
| LOC389895    | -1,954690148 | -0,163779903 | -3,309167979 | 0,002323513 | 0,026289898 | -2,292533697 |
| C19orf59     | -1,598168575 | -1,146494123 | -3,3079779   | 0,002330857 | 0,026355677 | -2,295532287 |
| SLC15A3      | -2,314338031 | 2,516455295  | -3,299481871 | 0,002383936 | 0,026780018 | -2,316924103 |
| SPIB         | -1,507535393 | -0,41855862  | -3,292761689 | 0,002426739 | 0,027129095 | -2,333825578 |
| CPXM2        | -2,571619325 | 0,945599644  | -3,29262556  | 0,002427614 | 0,027129095 | -2,334167773 |
| FBN1         | -1,992667898 | 3,53041767   | -3,289278047 | 0,002449216 | 0,027317326 | -2,342580419 |
| RUNDC3B      | -1,802657201 | -0,231132468 | -3,285740819 | 0,002472243 | 0,027485149 | -2,351465281 |
| HOXD8        | -2,408315018 | 1,443796434  | -3,280735291 | 0,002505183 | 0,027779622 | -2,364030218 |
| CSPG4        | -1,931268231 | 2,049615418  | -3,277114773 | 0,00252927  | 0,027974665 | -2,373112612 |
| LINC00839    | -1,843856671 | -0,353432419 | -3,275694415 | 0,00253878  | 0,028008024 | -2,376674357 |
| OGN          | -1,947581285 | -1,13395769  | -3,268461026 | 0,002587744 | 0,028426841 | -2,394801263 |
| INS-IGF2     | -2,387878471 | -0,583717324 | -3,266130689 | 0,00260371  | 0,02857775  | -2,400636878 |
| MAN1C1       | -1,886677782 | 1,450324283  | -3,264475789 | 0,002615106 | 0,028684543 | -2,404779816 |
| ITGA5        | -2,581312426 | 4,162170694  | -3,264142724 | 0,002617405 | 0,028691488 | -2,405613497 |
| TCF21        | -1,572373915 | -1,321561375 | -3,263847538 | 0,002619444 | 0,028695578 | -2,40635233  |
| IL22RA2      | -1,514339642 | -1,350578512 | -3,261103593 | 0,002638474 | 0,028830689 | -2,413218673 |
| ASB2         | -1,774139214 | 1,260712719  | -3,249092288 | 0,002723344 | 0,029626478 | -2,443241481 |
| CPNE5        | -1,7159364   | 0,14805933   | -3,248795988 | 0,002725471 | 0,02963089  | -2,443981398 |
| CACNA1C      | -1,577440544 | 1,257402815  | -3,243632835 | 0,002762777 | 0,02988675  | -2,456869359 |
| LOC100144604 | -2,252982497 | 1,149093354  | -3,231187903 | 0,002854716 | 0,030629951 | -2,487891414 |
| CHRD2        | -1,688353193 | -1,027238179 | -3,227854564 | 0,002879834 | 0,030871464 | -2,496190396 |
| ZNF521       | -2,439450006 | 1,018732316  | -3,220414689 | 0,00293666  | 0,031344183 | -2,514697788 |
| LPAR6        | -2,018102844 | 3,662733035  | -3,218268987 | 0,002953247 | 0,031471449 | -2,520031412 |
| CAV1         | -2,010108617 | 3,687330034  | -3,213812145 | 0,002987986 | 0,031763026 | -2,531104136 |
| TMOD2        | -1,791327564 | 0,722683913  | -3,206000434 | 0,003049818 | 0,032320561 | -2,550493003 |
| XCL1         | -2,161183611 | 0,640973235  | -3,201671286 | 0,003084608 | 0,032649072 | -2,561227709 |

|                    |              |              |              |             |             |              |
|--------------------|--------------|--------------|--------------|-------------|-------------|--------------|
| OLFML2A            | -1,981899528 | 2,193441858  | -3,193111487 | 0,003154516 | 0,033286717 | -2,582431072 |
| GBP1               | -2,226246019 | 4,301217636  | -3,192605451 | 0,003158696 | 0,033310412 | -2,583683658 |
| PPP1R14A           | -1,741661031 | 1,392456464  | -3,18728216  | 0,003202987 | 0,033623652 | -2,596854173 |
| GPR132             | -1,500419534 | 0,301486689  | -3,184163515 | 0,003229209 | 0,033805599 | -2,604564863 |
| SOCS3              | -2,064134149 | 4,540138557  | -3,177885608 | 0,003282618 | 0,034239828 | -2,62007488  |
| ISY1-<br>RAB43     | 2,053194161  | 4,703199041  | 3,173751289  | 0,003318249 | 0,034548705 | -2,630280388 |
| NDUFA4L2           | -2,528492768 | 2,458345799  | -3,171018175 | 0,003342006 | 0,034775032 | -2,637023271 |
| GBP1P1             | -1,561141907 | -0,471393813 | -3,16400073  | 0,003403748 | 0,035310812 | -2,654322271 |
| INPP5D             | -2,038317157 | 2,794122065  | -3,153540481 | 0,003497804 | 0,03598308  | -2,680071303 |
| C10orf54           | -1,933429357 | 2,982851356  | -3,150790625 | 0,003522937 | 0,036114366 | -2,686832993 |
| C2orf74            | -1,757924756 | 0,892958096  | -3,150767652 | 0,003523148 | 0,036114366 | -2,68688947  |
| PSMB9              | -2,255277754 | 4,043009917  | -3,144602921 | 0,003580124 | 0,036589504 | -2,702036827 |
| C1orf228           | -1,548204872 | 1,08030149   | -3,131000423 | 0,00370896  | 0,037593883 | -2,73540446  |
| FEZ1               | -1,744533853 | 1,169145338  | -3,119693137 | 0,003819404 | 0,038374539 | -2,763083796 |
| CR1                | -1,644393859 | 0,027683983  | -3,113087254 | 0,003885367 | 0,038801019 | -2,779229943 |
| TLE4               | -1,73229336  | 1,608455767  | -3,111251526 | 0,003903889 | 0,0388831   | -2,783713618 |
| ANGPT1             | -1,714371531 | -0,367647823 | -3,11093442  | 0,003907097 | 0,038892558 | -2,784487992 |
| SLC24A3            | -1,779962657 | 0,765325965  | -3,110506104 | 0,003911435 | 0,038913238 | -2,785533872 |
| CSDC2              | -1,764658893 | 0,04575656   | -3,103232781 | 0,003985786 | 0,039515957 | -2,80328251  |
| GNG11              | -2,446063294 | 3,955415516  | -3,102339335 | 0,003995011 | 0,03958463  | -2,805461204 |
| STARD9             | -1,583889331 | 1,459315082  | -3,093718524 | 0,004085074 | 0,040222451 | -2,826466083 |
| ANKRD1             | 1,903648144  | 0,924675443  | 3,093076673  | 0,004091857 | 0,040266207 | -2,828028723 |
| MAF                | -2,256795774 | 2,418267585  | -3,092083564 | 0,004102371 | 0,040323595 | -2,830446187 |
| CUBN               | -1,842163716 | 1,631509965  | -3,086957393 | 0,004157056 | 0,040690113 | -2,842917892 |
| LYPLAL1            | -2,408145187 | 1,361797287  | -3,086407138 | 0,004162966 | 0,040690113 | -2,844255972 |
| EMILIN3            | -1,513377559 | -0,119053008 | -3,083975036 | 0,004189188 | 0,040873659 | -2,850168695 |
| PAGE4              | -1,962631588 | -1,126432539 | -3,08030801  | 0,004229021 | 0,0412156   | -2,859078926 |
| CHN1               | -1,538351867 | 2,95803722   | -3,064122132 | 0,004409174 | 0,0427055   | -2,898339376 |
| EHD2               | -2,017014859 | 3,035747639  | -3,059147874 | 0,004465985 | 0,043110277 | -2,910382423 |
| HSD17B3            | -1,591716702 | 0,317167458  | -3,05735217  | 0,004486665 | 0,043272366 | -2,914727345 |
| HLA-H              | -1,994350282 | 4,013863467  | -3,057035968 | 0,004490315 | 0,043272366 | -2,915492289 |
| GFPT2              | -1,837141007 | 0,75392449   | -3,055969648 | 0,004502647 | 0,043342699 | -2,918071577 |
| SERPINE1           | -2,358816791 | 2,691116428  | -3,053907088 | 0,004526592 | 0,043524536 | -2,923059247 |
| SNCAIP             | -2,099601133 | 1,966180476  | -3,052634066 | 0,004541431 | 0,043594196 | -2,926136748 |
| MOXD1              | -2,604479107 | 2,963882075  | -3,048209969 | 0,004593361 | 0,043921301 | -2,936826452 |
| CCDC78             | -1,938386609 | 2,267998486  | -3,047782486 | 0,004598408 | 0,043941998 | -2,937858907 |
| FCRL2              | -1,548662287 | -0,315010149 | -3,046823801 | 0,004609747 | 0,044004683 | -2,940174035 |
| FAM20A             | -2,580689615 | 2,55905711   | -3,041022121 | 0,004678932 | 0,044480732 | -2,954175998 |
| PLAC9              | -1,546763418 | -1,259204681 | -3,037963161 | 0,004715806 | 0,0447438   | -2,961552708 |
| FBLN2              | -1,748958854 | 2,366301404  | -3,036876163 | 0,004728975 | 0,044795205 | -2,964173034 |
| ZNF662             | -1,78655362  | 0,413428801  | -3,033767751 | 0,004766827 | 0,045079365 | -2,971663356 |
| GABRB3             | -1,505719191 | -0,837693175 | -3,02476955  | 0,004878024 | 0,045901605 | -2,993322488 |
| HSPB6              | -2,32502395  | 1,449685522  | -3,020235905 | 0,004934975 | 0,046237874 | -3,004221766 |
| ADGB               | -1,507507987 | -0,850907499 | -3,011781621 | 0,005042864 | 0,046977572 | -3,02452246  |
| CIITA              | -1,581929475 | 2,395237688  | -3,007822177 | 0,005094156 | 0,047284428 | -3,034019157 |
| LOC100132<br>062   | -1,842543857 | -0,550528951 | -3,00368166  | 0,005148321 | 0,047640646 | -3,043942736 |
| LOC100132<br>287   | -1,842543857 | -0,550528951 | -3,00368166  | 0,005148321 | 0,047640646 | -3,043942736 |
| AMY2B              | -1,529628105 | 2,912296695  | -3,002906803 | 0,005158518 | 0,047658177 | -3,04579899  |
| C10orf32-<br>AS3MT | 2,299884188  | 0,303031446  | 2,995281123  | 0,005259894 | 0,048387093 | -3,064052916 |
| C15orf48           | -2,868190606 | 1,686441622  | -2,989822395 | 0,005333617 | 0,048881393 | -3,077103801 |
| RGS10              | -1,578047696 | 5,816060454  | -2,980929058 | 0,005455821 | 0,049692816 | -3,098337699 |

|       |              |              |              |             |             |              |
|-------|--------------|--------------|--------------|-------------|-------------|--------------|
| TEKT4 | -1,769992417 | -0,086448575 | -2,97819255  | 0,005493953 | 0,049890106 | -3,104864295 |
| CD74  | -2,285943382 | 9,234588414  | -2,978020317 | 0,005496361 | 0,049890106 | -3,105274958 |

**Table S5. Genes included in card**

|        |        |       |        |        |         |
|--------|--------|-------|--------|--------|---------|
| ABL1   | CTNNB1 | FLT3  | KIT    | NOTCH1 | RUNX1   |
| AKT1   | EGFR   | GATA1 | KRAS   | NOTCH4 | SMAD4   |
| AKT2   | ERBB2  | GNA11 | MAG    | NRAS   | SMARCB1 |
| AKT3   | ERBB3  | GNAQ  | MAP2K1 | PDGFRA | SRC     |
| ALK    | ESR1   | GNAS  | MET    | PIK3CA | STK11   |
| APC    | FBXW7  | HRAS  | MLH1   | PIK3R1 | TP53    |
| BRAF   | FGFR1  | IDH1  | MPL    | PIK3R5 | VHL     |
| CDH1   | FGFR2  | IDH2  | MSH6   | PTEN   |         |
| CDKN2A | FGFR3  | JAK1  | MYC    | RB1    |         |
| CSF1R  | FGFR4  | JAK3  | NF2    | RET    |         |

**Table S6. Mutational study**

| Sample | Only in primary tumor                                                                       | Only in PDOX                                                                                                           | Shared mutations                                                                                                                                    |
|--------|---------------------------------------------------------------------------------------------|------------------------------------------------------------------------------------------------------------------------|-----------------------------------------------------------------------------------------------------------------------------------------------------|
| 1      | ERBB2_V477L                                                                                 | PIK3CA_R88Q; PTEN_E7X;<br>PTEN_R130Q; RB1_E137X                                                                        | PTEN_M134I; TP53_R273C                                                                                                                              |
| 2      | TP53_R213X                                                                                  |                                                                                                                        | APC_V1377I; CDKN2A_H83Y;<br>FGFR1_R609X; FGFR1_E612K;<br>FGFR2_V463I; PIK3CA_R88Q;<br>PIK3CA_R108C; PTEN_E7X;<br>PTEN_R130Q; PTEN_F341V; TP53_R342X |
| 3      |                                                                                             | FBXW7_R465C; FGFR4_P279T                                                                                               | PIK3R1_N564D                                                                                                                                        |
| 4      |                                                                                             | FGFR3_T394M; TP53_Q165K                                                                                                | KRAS_G13D; PIK3CA_E545G;<br>PTEN_R130G; PTEN_T321fs                                                                                                 |
| 5      |                                                                                             |                                                                                                                        | ERBB3_N62K; PTEN_R130G;<br>PTEN_T321fs                                                                                                              |
| 6      |                                                                                             | CTNNB1_D32N; FGFR1_A21T;<br>MSH6_T1085fs; PIK3R1_T576fs;<br>TP53_Q165K                                                 | FGFR2_S252W; PTEN_S229X                                                                                                                             |
| 7      | FGFR2_N228H                                                                                 | FGFR2_S57L; JAK1_D145E;<br>KRAS_Q61H; PIK3CA_E545K;<br>PIK3R1_L466X; PTEN_E7X;<br>RB1_K130T; STK11_Q37X;<br>TP53_K132T | FGFR1_c_1430+7A>C; PIK3CA_E81K                                                                                                                      |
| 8      | STK11_G279fs                                                                                | FGFR3_c_616-6G>A; NRAS_G12V                                                                                            | FGFR4_E316V; NRAS_G12D                                                                                                                              |
| 9      |                                                                                             | PTEN_L182V                                                                                                             | CTNNB1_G34R; PIK3CA_E542Q                                                                                                                           |
| 10     |                                                                                             | FGFR4_A729V; PTEN_R130G;<br>PTEN_Y177fs                                                                                | EGFR_M793V; JAK1_K142fs;<br>NOTCH1_L1678M; TP53_R342X                                                                                               |
| 11     | CDKN2A_R103Q;<br>HRAS_E63del;<br>STK11_G163D;<br>TP53_R273C                                 |                                                                                                                        | MSH6_T1085fs; PTEN_L265fs;<br>PTEN_T321fs                                                                                                           |
| 12     | FBXW7_R465C;<br>TP53_R280I                                                                  | APC_R564X; JAK1_K142fs;<br>TP53_H179R                                                                                  | ERBB2_R678Q; PIK3CA_Y1021C;<br>PTEN_T321fs; TP53_R273C                                                                                              |
| 13     | APC_S1400L;<br>CTNNB1_D32G;<br>FGFR4_c_2154-5C>T;<br>PIK3CA_R88Q                            | FGFR4_E330K; JAK1_D145E;<br>TP53_F341V; TP53_R213X;<br>TP53_D281E                                                      | ERBB2_T900S; PTEN_E299X                                                                                                                             |
| 14     |                                                                                             |                                                                                                                        | KRAS_G12C; PIK3CA_H1047R;<br>PTEN_L265fs; PTEN_E291fs;<br>STK11_P275L                                                                               |
| 15     | APC_T1292M;<br>FGFR2_R759X;<br>FGFR2_c_940-4C>A;<br>KIT_K558N;<br>PTEN_E299X;<br>TP53_R290C | FBXW7_R465H                                                                                                            | TP53_R213X                                                                                                                                          |

## SUPPORTING FIGURE LEGENDS

Suppl Figure-1

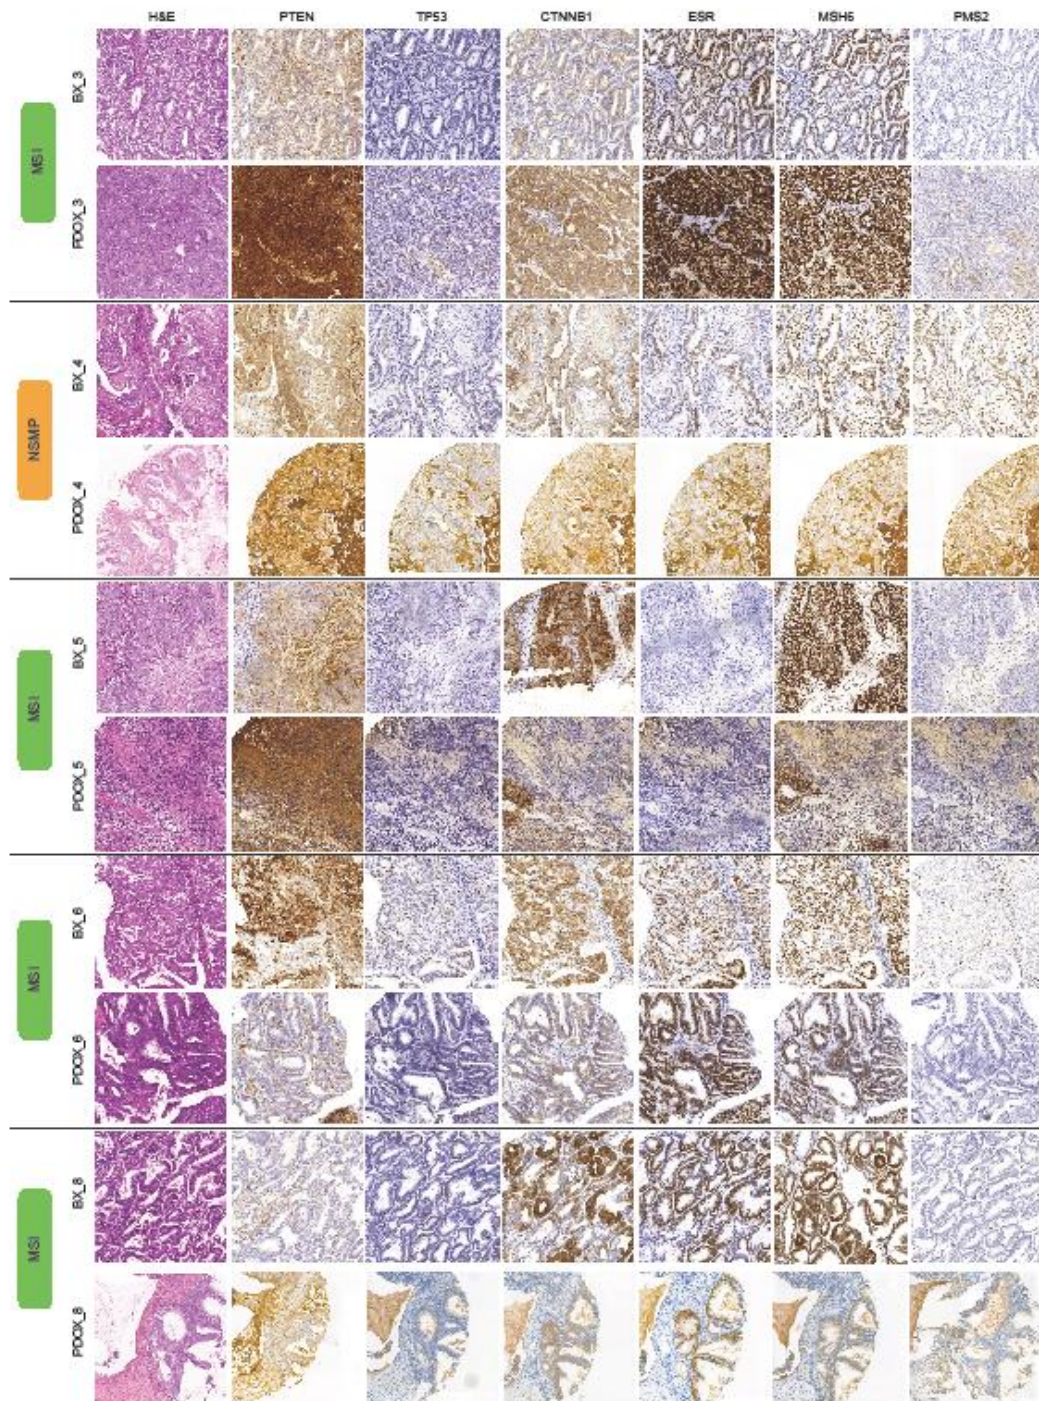

**Figure S1.** Morphological and immunohistochemical correlation between primary tumors (BXs) and PDOXs. Images illustrate HE stainings and detection by immunohistochemistry of PTEN, TP53, CTNNB1, ESR, MSH6 and PMS2 between BX and PDOX. BX3, BX5, BX6, BX8 (MSI) and BX4 (MSS).

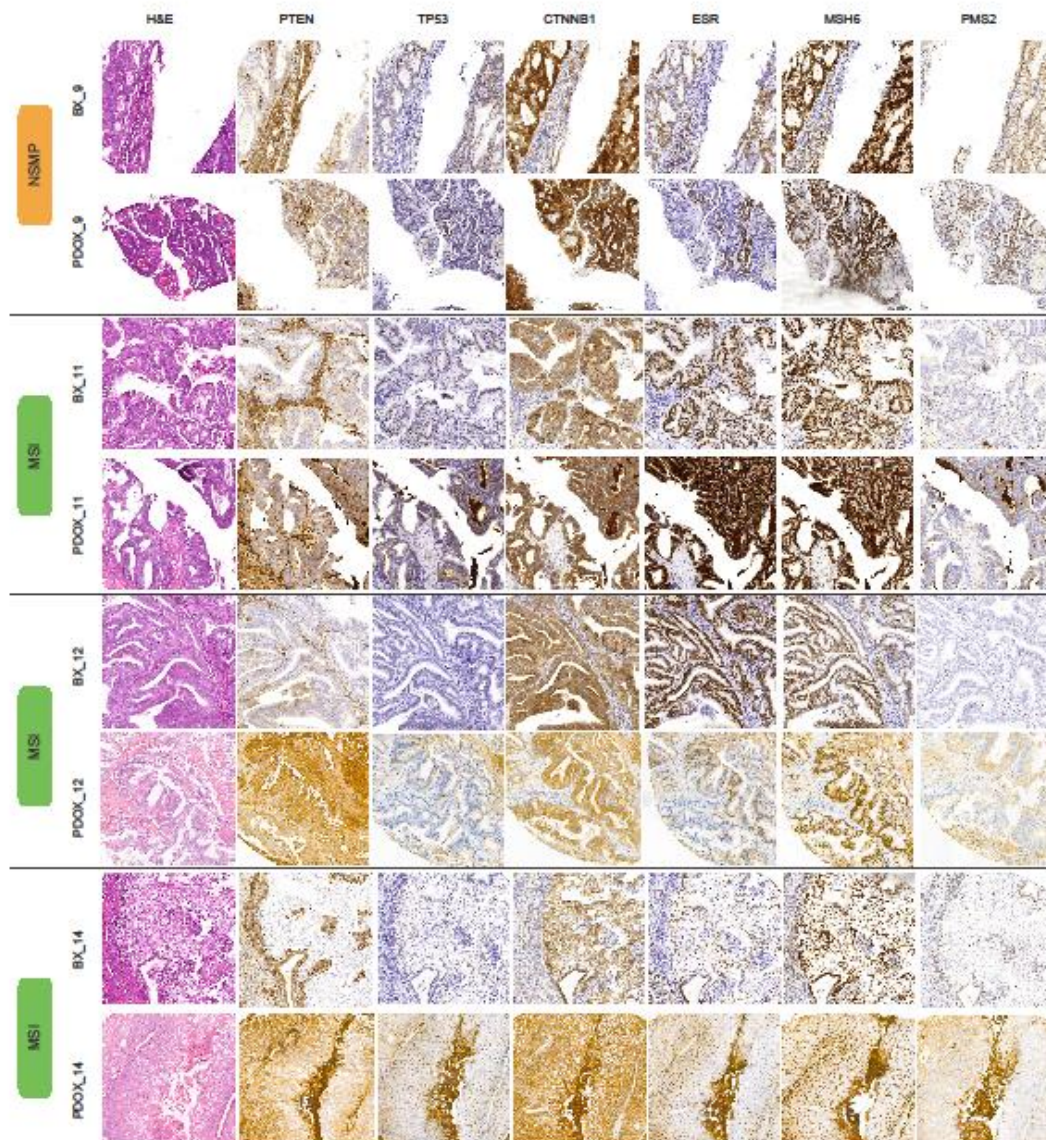

**Figure S2.** Morphological and immunohistochemical correlation between primary tumors (BXs) and PDOXs. Images illustrate HE stainings and detection by immunohistochemistry of PTEN, TP53, CTNNB1, ESR, MSH6 and PMS2 between BX and PDOX. BX11, BX12, BX14 (MSI) and BX9 (MSS).

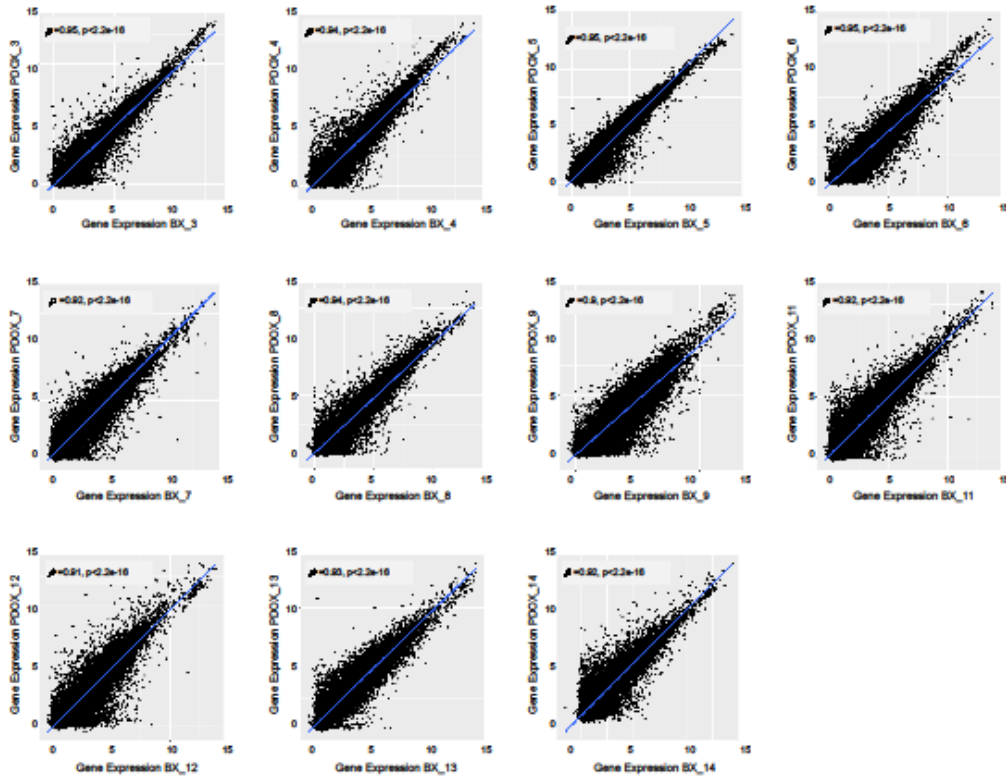

**Figure S3.** Transcriptomic analysis of BX and PDX tumor pairs. Total RNA sequencing for the 15 pairs of BX/PDX tumors was conducted and computationally analyzed. BX and PDX pairs correlated extremely well at transcriptomic level. Spearman's correlation ( $\rho$ ) values and P values indicate the strength and significance of the correlations, respectively.



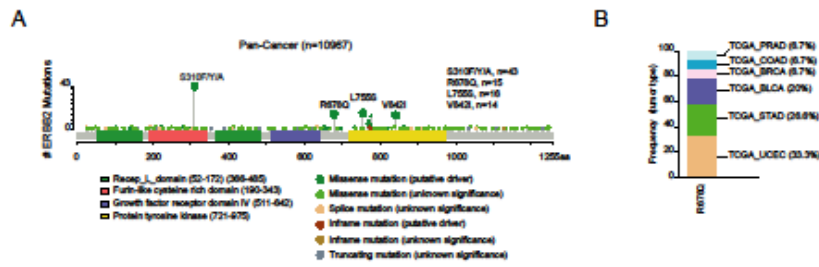

**Figure S4.** (A) Lollipop plot and analysis of the ERBB2 mutational landscape using the TCGA pancancer dataset (n=10,967) showing that ERBB2<sup>R678Q</sup> is one of the most representative ERBB2 mutations. (B) Stacked bar chart illustrating the distribution of ERBB2<sup>R678Q</sup> according to tumor types and the highest representation in endometrial cancer (TCGA\_ucec).
